# Supplementary material for: Potential neuroprotective benefits of plant-based fermented foods in Alzheimer's disease: an update on preclinical evidence
Source: Royal Society of Chemistry journal article supplement (doi:10.1039/d3fo03805j), 2024-01-01
Supplement: d3fo03805j2.pdf [file d3fo03805j2.pdf]

OR (Suan-tsai[Title/Abstract])) OR (Sunki[Title/Abstract])) OR (Takuanzuke[Title/Abstract])) OR (Tuaitur[Title/Abstract])) OR (Bekang[Title/Abstract])) OR (Bhallae[Title/Abstract])) OR (Bikalga[Title/Abstract])) OR (Chungkokjang[Title/Abstract])) OR (Jeonkukjang[Title/Abstract])) OR (Cheonggukjang[Title/Abstract])) OR (Dawadawa[Title/Abstract])) OR (Dhokla[Title/Abstract])) OR (Douchi[Title/Abstract])) OR (Doenjang[Title/Abstract])) OR (Furu[Title/Abstract])) OR (Gochujang[Title/Abstract])) OR (Hawaijar[Title/Abstract])) OR (Iru[Title/Abstract])) OR (Kanjang[Title/Abstract])) OR (Kawal[Title/Abstract])) OR (Kecap[Title/Abstract])) OR (Ketjap[Title/Abstract])) OR (Kinda[Title/Abstract])) OR (Kinema[Title/Abstract])) OR (Maseura[Title/Abstract])) OR (Meitauza[Title/Abstract])) OR (Meju[Title/Abstract])) OR (Natto[Title/Abstract])) OR (Oncom Hitam[Title/Abstract])) OR ("Black Oncom"[Title/Abstract])) OR ("Oncom Merah"[Title/Abstract])) OR ("Orange Oncom"[Title/Abstract])) OR (Ogiri[Title/Abstract])) OR (Ogili[Title/Abstract])) OR (Okpehe[Title/Abstract])) OR (Soumbala[Title/Abstract])) OR (Shoyu[Title/Abstract])) OR (Sufu[Title/Abstract])) OR (Tauco[Title/Abstract])) OR (Tempe[Title/Abstract])) OR (Thua nao[Title/Abstract])) OR (Tungrymbai[Title/Abstract])) OR (Ugba[Title/Abstract])) OR (Wari[Title/Abstract])) OR (Yandou[Title/Abstract])) OR (Chikwangu[Title/Abstract])) OR (Cingwada[Title/Abstract])) OR (Fufu[Title/Abstract])) OR (Gari[Title/Abstract])) OR (Lafun[Title/Abstract])) OR (Konkonte[Title/Abstract])) OR (Tape[Title/Abstract])) OR (Tapai Ubi[Title/Abstract])) OR (Bushera, Obushera[Title/Abstract])) OR (Ikii[Title/Abstract])) OR (Koozh[Title/Abstract])) OR (Mahewu[Title/Abstract])) OR (Swazi[Title/Abstract])) OR (Ting[Title/Abstract])) OR (Garri[Title/Abstract])) OR (Siljo[Title/Abstract])

|   |                                                                                                                                                                                                                                                                                                                                                                                                                                                                                                                                                                                                                                                                                                                                                                                                                                                                                                                                                                                                                                                                                                                                                                                                                                                                                                                                                                                                                                                                                                                                                                                                                                                                                                                                                                                                                                                                                                                                                                                                                                                                                                                                                                                                                                                                                                                                                                                                                                                                                                                                                                                                                                                                                                                                                                                                                                                                                                                                                                                                                       |        |
|---|-----------------------------------------------------------------------------------------------------------------------------------------------------------------------------------------------------------------------------------------------------------------------------------------------------------------------------------------------------------------------------------------------------------------------------------------------------------------------------------------------------------------------------------------------------------------------------------------------------------------------------------------------------------------------------------------------------------------------------------------------------------------------------------------------------------------------------------------------------------------------------------------------------------------------------------------------------------------------------------------------------------------------------------------------------------------------------------------------------------------------------------------------------------------------------------------------------------------------------------------------------------------------------------------------------------------------------------------------------------------------------------------------------------------------------------------------------------------------------------------------------------------------------------------------------------------------------------------------------------------------------------------------------------------------------------------------------------------------------------------------------------------------------------------------------------------------------------------------------------------------------------------------------------------------------------------------------------------------------------------------------------------------------------------------------------------------------------------------------------------------------------------------------------------------------------------------------------------------------------------------------------------------------------------------------------------------------------------------------------------------------------------------------------------------------------------------------------------------------------------------------------------------------------------------------------------------------------------------------------------------------------------------------------------------------------------------------------------------------------------------------------------------------------------------------------------------------------------------------------------------------------------------------------------------------------------------------------------------------------------------------------------------|--------|
| 7 | <p>(((((Bacillus, fermented[Title/Abstract]) OR (Bacillus amyloliquefaciens, fermented[Title/Abstract])) OR (Bacillus subtilis, fermented[Title/Abstract])) OR (Bifidobacterium, fermented[Title/Abstract])) OR (Enterococcus faecalis, fermented[Title/Abstract])) OR (Enterococcus faecium, fermented[Title/Abstract])) OR (LAB, fermented[Title/Abstract])) OR (Lactiplantibacillus plantarum, fermented[Title/Abstract])) OR (Lactic acid bacteria, fermented[Title/Abstract])) OR (Lactobacillus, fermented[Title/Abstract])) OR (Lactococcus, fermented[Title/Abstract])) OR (Latilactobacillus sakei, fermented[Title/Abstract])) OR (Leuconostoc, fermented[Title/Abstract])) OR (Levilactobacillus brevis, fermented[Title/Abstract])) OR (Limosilactobacillus Fermentum, fermented[Title/Abstract])) OR (Fungus, fermented[Title/Abstract])) OR (Mold, fermented[Title/Abstract])) OR (Aspergillus, fermented[Title/Abstract])) OR (Oenococcus, fermented[Title/Abstract])) OR (Pediococcus, fermented[Title/Abstract])) OR (Red mold-fermented[Title/Abstract])) OR (Streptococcus, fermented[Title/Abstract])) OR (Rhizopus, fermented[Title/Abstract])) OR (Saccharomyces, fermented[Title/Abstract])) OR (Streptococcus thermophilus, fermented[Title/Abstract])) OR (Weissella, fermented[Title/Abstract])) OR (Monascus, fermented[Title/Abstract])) OR (Mucor, fermented[Title/Abstract])) OR (Lactobacillus bulgaricus, fermented[Title/Abstract])) OR (Weissella confusa, fermented[Title/Abstract])) OR (Lactobacillus amylolyticus, fermented[Title/Abstract])) OR (Lactobacillus helveticus, fermented[Title/Abstract])) OR (Lactobacillus acidophilus, fermented[Title/Abstract])) OR (Lactobacillus coprophilus, fermented[Title/Abstract])) OR (Lactococcus raffinolactis, fermented[Title/Abstract])) OR (Leuconostoc mesenteroides, fermented[Title/Abstract])) OR (Lacticaseibacillus paracasei, fermented[Title/Abstract])) OR (Lactobacillus delbrueckii, fermented[Title/Abstract])) OR (Weissella confusa, fermented[Title/Abstract])) OR (Lacticaseibacillus rhamnosus, fermented[Title/Abstract])) OR (Pediococcus sp., fermented[Title/Abstract])) OR (Leuconostoc sp., fermented[Title/Abstract])) OR (Weissella sp., fermented[Title/Abstract])) OR (Streptococcus lutetiensis, fermented[Title/Abstract])) OR (Clostridium perfringens, fermented[Title/Abstract])) OR (Pediococcus pentosaceus, fermented[Title/Abstract])) OR (Lactiplantibacillus paraplantarum, fermented[Title/Abstract])) OR (Pediococcus acidilacti, fermented[Title/Abstract])) OR (Lactococcus lactis, fermented[Title/Abstract])) OR (Lactobacillus gasseri, fermented[Title/Abstract])) OR (Enterococcus sp., fermented[Title/Abstract])) OR (Escherichia coli, fermented[Title/Abstract])) OR (Bacillus sp., fermented[Title/Abstract])) OR (Limosilactobacillus reuteri, fermented[Title/Abstract])) OR (Bifidobacterium sp., fermented[Title/Abstract])) OR (Leuconostoc pseudomesenteroides,</p> | 21,693 |
|---|-----------------------------------------------------------------------------------------------------------------------------------------------------------------------------------------------------------------------------------------------------------------------------------------------------------------------------------------------------------------------------------------------------------------------------------------------------------------------------------------------------------------------------------------------------------------------------------------------------------------------------------------------------------------------------------------------------------------------------------------------------------------------------------------------------------------------------------------------------------------------------------------------------------------------------------------------------------------------------------------------------------------------------------------------------------------------------------------------------------------------------------------------------------------------------------------------------------------------------------------------------------------------------------------------------------------------------------------------------------------------------------------------------------------------------------------------------------------------------------------------------------------------------------------------------------------------------------------------------------------------------------------------------------------------------------------------------------------------------------------------------------------------------------------------------------------------------------------------------------------------------------------------------------------------------------------------------------------------------------------------------------------------------------------------------------------------------------------------------------------------------------------------------------------------------------------------------------------------------------------------------------------------------------------------------------------------------------------------------------------------------------------------------------------------------------------------------------------------------------------------------------------------------------------------------------------------------------------------------------------------------------------------------------------------------------------------------------------------------------------------------------------------------------------------------------------------------------------------------------------------------------------------------------------------------------------------------------------------------------------------------------------------|--------|

fermented[Title/Abstract])) OR (Weissella cibaria, fermented[Title/Abstract])) OR (Lactobacillus casei, fermented[Title/Abstract])) OR (Lactobacillus bulgaricus, fermented[Title/Abstract])) OR (Leuconostoc citreum, fermented[Title/Abstract])) OR (Lactobacillus harbinensis, fermented[Title/Abstract])) OR (Lactobacillus coryniformis, fermented[Title/Abstract])) OR (Lentilactobacillus parabuchneri, fermented[Title/Abstract])) OR (Streptococcus faecalis, fermented[Title/Abstract])) OR (Pediococcus cerevisiae, fermented[Title/Abstract])) OR (Lactobacillus delbruekii, fermented[Title/Abstract])) OR (Micrococcus sp., fermented[Title/Abstract])) OR (Lactobacillus pentosus, fermented[Title/Abstract])) OR (Leu. mesenteroides, fermented[Title/Abstract])) OR (Streptococcus thermophilus, fermented[Title/Abstract])) OR (Bacillus lactis, fermented[Title/Abstract])) OR (Bacillus longum, fermented[Title/Abstract])) OR (Bacillus infantis, fermented[Title/Abstract])) OR (Lacticaseibacillus mesenteroides, fermented[Title/Abstract])) OR (Lacticaseibacillus cremoris, fermented[Title/Abstract])) OR (Lacticaseibacillus lactis, fermented[Title/Abstract])) OR (Bifidobacterium lactis, fermented[Title/Abstract])) OR (Clostridium, fermented[Title/Abstract])) OR (Butyrivibrio, fermented[Title/Abstract])) OR (Escherichia, fermented[Title/Abstract])) OR (Enterobacter, fermented[Title/Abstract])) OR (Salmonella, fermented[Title/Abstract])) OR (Klebsiella, fermented[Title/Abstract])) OR (Shigella, fermented[Title/Abstract])) OR (Propionibacter, fermented[Title/Abstract])) OR (Veilonella, fermented[Title/Abstract])) OR (Bacteroides, fermented[Title/Abstract])) OR (Clostridia, fermented[Title/Abstract])) OR (Acetobacter, fermented[Title/Abstract])) OR (Gluconobacter, fermented[Title/Abstract])) OR (Gluconacetobacter, fermented[Title/Abstract])) OR (Halomonas, fermented[Title/Abstract])) OR (Hafnia, fermented[Title/Abstract])) OR (Tatumella, fermented[Title/Abstract])) OR (Zymomonas, fermented[Title/Abstract])) OR (Brachybacter, fermented[Title/Abstract])) OR (Microbacter, fermented[Title/Abstract])) OR (Brevibacter, fermented[Title/Abstract])) OR (Corynebacter, fermented[Title/Abstract])) OR (Micrococcus, fermented[Title/Abstract])) OR (Kocuria, fermented[Title/Abstract])) OR (Arthrobacter, fermented[Title/Abstract])) OR (Propionibacter, fermented[Title/Abstract])) OR (Streptomyces, fermented[Title/Abstract])) OR (Bifidobacter, fermented[Title/Abstract])) OR (Gemella, fermented[Title/Abstract])) OR (Jeotgalicoccus, fermented[Title/Abstract])) OR (Carnobacter, fermented[Title/Abstract])) OR (Enterococcus, fermented[Title/Abstract])) OR (Tetragenococcus, fermented[Title/Abstract])) OR (Vagococcus, fermented[Title/Abstract])) OR (Weissella, fermented[Title/Abstract])) OR (Staphylococcus, fermented[Title/Abstract])) OR (Actinomucor, fermented[Title/Abstract])) OR (Amylomyces, fermented[Title/Abstract])) OR (Bjerkandera, fermented[Title/Abstract])) OR (Brettanomyces, fermented[Title/Abstract])) OR (Candida, fermented[Title/Abstract])) OR (Cryptococcus, fermented[Title/Abstract])) OR

(Cyberlindnera, fermented[Title/Abstract]) OR (Cystofilobasidium, fermented[Title/Abstract]) OR (Debaryomyces, fermented[Title/Abstract]) OR (Dekkera, fermented[Title/Abstract]) OR (Fusarium, fermented[Title/Abstract]) OR (Galactomyces, fermented[Title/Abstract]) OR (Geotrichum, fermented[Title/Abstract]) OR (Cladosporium, fermented[Title/Abstract]) OR (Guehomyces, fermented[Title/Abstract]) OR (Hanseniaspora, fermented[Title/Abstract]) OR (Hansenula, fermented[Title/Abstract]) OR (Hyphopichia, fermented[Title/Abstract]) OR (Issatchenkia, fermented[Title/Abstract]) OR (Kazachstania, fermented[Title/Abstract]) OR (Kluyveromyces, fermented[Title/Abstract]) OR (Lecanicillium, fermented[Title/Abstract]) OR (Lachancea, fermented[Title/Abstract]) OR (Metschnikowia, fermented[Title/Abstract]) OR (Neurospora, fermented[Title/Abstract]) OR (Penicillium, fermented[Title/Abstract]) OR (Pichia, fermented[Title/Abstract]) OR (Rhodotorula, fermented[Title/Abstract]) OR (Rhodosporidium, fermented[Title/Abstract]) OR (Saccharomyces, fermented[Title/Abstract]) OR (Saccharomycopsis, fermented[Title/Abstract]) OR (Schizosaccharomyces, fermented[Title/Abstract]) OR (Schwanniomyces, fermented[Title/Abstract]) OR (Sporobolomyces, fermented[Title/Abstract]) OR (Scopulariopsis, fermented[Title/Abstract]) OR (Sporendonema, fermented[Title/Abstract]) OR (Starmerella, fermented[Title/Abstract]) OR (Torulaspora, fermented[Title/Abstract]) OR (Trametes, fermented[Title/Abstract]) OR (Trichosporon, fermented[Title/Abstract]) OR (Trigonopsis, fermented[Title/Abstract]) OR (Torulopsis, fermented[Title/Abstract]) OR (Ustilago, fermented[Title/Abstract]) OR (Wickerhamomyces, fermented[Title/Abstract]) OR (Yarrowia, fermented[Title/Abstract]) OR (Zygosaccharomyces, fermented[Title/Abstract]) OR (Zygorulaspora, fermented[Title/Abstract])



(*Vigna unguiculata*, fermented[Title/Abstract]) OR (Black-eyed pea, fermented[Title/Abstract]) OR (*Cicer arietinum* L., fermented[Title/Abstract]) OR (Common bean, fermented[Title/Abstract]) OR (*Vigna sinensis* L. var. *carilla*, fermented[Title/Abstract]) OR (*Guanacaste*, fermented[Title/Abstract]) OR (*Enterolobium cyclocarpum*, fermented[Title/Abstract]) OR (Horse gram, fermented[Title/Abstract]) OR (*Macrotyloma uniflorum*, fermented[Title/Abstract]) OR (Kidney bean, fermented[Title/Abstract]) OR (*Lens culinaris*, fermented[Title/Abstract]) OR (Lima bean, fermented[Title/Abstract]) OR (*Phaseolus lunatus*, fermented[Title/Abstract]) OR (Lupin, fermented[Title/Abstract]) OR (*Lupinus albus*, fermented[Title/Abstract]) OR (*Lupinus luteus*, fermented[Title/Abstract]) OR (*Lupinus angustifolius* L., fermented[Title/Abstract]) OR (Lyon bean, fermented[Title/Abstract]) OR (*Mucuna cochinchinensis*, fermented[Title/Abstract]) OR (Mahogany Bean, fermented[Title/Abstract]) OR (*Azelia africana*, fermented[Title/Abstract]) OR (Mung bean, fermented[Title/Abstract]) OR (*Vigna radiata*, fermented[Title/Abstract]) OR (Pigeon pea, fermented[Title/Abstract]) OR (*Cajanus cajan*, fermented[Title/Abstract]) OR (Red bean, fermented[Title/Abstract]) OR (*Phaseolus angularis*, fermented[Title/Abstract]) OR (*Glycine max*, fermented[Title/Abstract]) OR (Tamarind, fermented[Title/Abstract]) OR (*Tamarindus indica* L., fermented[Title/Abstract]) OR (*Vigna racemosa*, fermented[Title/Abstract]) OR (Mulberry, fermented[Title/Abstract]) OR (*Morus nigra*, fermented[Title/Abstract]) OR (Pomegranate, fermented[Title/Abstract]) OR (*Punica granatum* L., fermented[Title/Abstract]) OR (Cashew apple, fermented[Title/Abstract]) OR (*Anacardium occidentale* L., fermented[Title/Abstract]) OR (Cantaloupe melon, fermented[Title/Abstract]) OR (*Cucumis melo* L., fermented[Title/Abstract]) OR (Apple, fermented[Title/Abstract]) OR (Noni, fermented[Title/Abstract]) OR (*Morinda citrifolia*, fermented[Title/Abstract]) OR (Pear, fermented[Title/Abstract]) OR (*Pyrus communis*, fermented[Title/Abstract]) OR (Cherry, fermented[Title/Abstract]) OR (Litchi, fermented[Title/Abstract]) OR (*Litchi chinensis* Sonn., fermented[Title/Abstract]) OR (Orange, fermented[Title/Abstract]) OR (Papaya, fermented[Title/Abstract]) OR (*Carica papaya* L., fermented[Title/Abstract]) OR (Grape, fermented[Title/Abstract]) OR (Cranberry, fermented[Title/Abstract]) OR (Prickly pear, fermented[Title/Abstract]) OR (*Phyllanthus emblica*, fermented[Title/Abstract]) OR (Jujube, fermented[Title/Abstract]) OR (*Ziziphus jujuba* Mill., fermented[Title/Abstract]) OR (Feijoa, fermented[Title/Abstract]) OR (*Feijoa sellowiana*, fermented[Title/Abstract]) OR (Tomato, fermented[Title/Abstract]) OR (*Lycopersicon esculentum*, fermented[Title/Abstract]) OR (Cactus pear, fermented[Title/Abstract]) OR (*Opuntia ficus-indica*, fermented[Title/Abstract]) OR (Carrot, fermented[Title/Abstract]) OR (Potato, fermented[Title/Abstract]) OR (*Solanum tuberosum* L.,



fermented[Title/Abstract])) OR (Beetroot, fermented[Title/Abstract])) OR (Beta vulgaris L., fermented[Title/Abstract])) OR (Lycopersicum  
esculentum, fermented[Title/Abstract])) OR (haw, fermented[Title/Abstract])) OR (Mustard, fermented[Title/Abstract])) OR (Cupers,  
fermented[Title/Abstract])) OR (Cucumbers, fermented[Title/Abstract])) OR (beet, fermented[Title/Abstract])) OR (eggplant,  
fermented[Title/Abstract])) OR (Bamboo shoot, fermented[Title/Abstract])) OR (Red onion, fermented[Title/Abstract])) OR (green onion,  
fermented[Title/Abstract])) OR (hot pepper, fermented[Title/Abstract])) OR (ginger, fermented[Title/Abstract])) OR (Olive,  
fermented[Title/Abstract])) OR ("Gynandropis pentaphylla, fermented"[Title/Abstract])) OR (Turnip, fermented[Title/Abstract])) OR (Roselle,  
fermented[Title/Abstract])) OR (Peanut, fermented[Title/Abstract])) OR (tapioca, fermented[Title/Abstract])) OR (Melon Seeds,  
fermented[Title/Abstract])) OR ("castor oil seeds, fermented"[Title/Abstract])) OR (pumpkin bean, fermented[Title/Abstract])) OR (sesame,  
fermented[Title/Abstract])) OR ("Prosopis africana, fermented"[Title/Abstract])) OR ("Pentaclethra macrophylla, fermented"[Title/Abstract]))  
OR (Ragi, fermented[Title/Abstract])



(*Morus alba*, fermented[Title/Abstract])) OR (*Morus nigra*, fermented[Title/Abstract])) OR (*Myrica gale*, fermented[Title/Abstract])) OR (*Malus*, fermented[Title/Abstract])) OR (*Malus sylvestris*, fermented[Title/Abstract])) OR (*Panicum miliaceum*, fermented[Title/Abstract])) OR (*Persicaria bistorta*, fermented[Title/Abstract])) OR (*Phaseolus vulgaris*, fermented[Title/Abstract])) OR (*Pimenta dioica*, fermented[Title/Abstract])) OR (*Piper nigrum*, fermented[Title/Abstract])) OR (*Pisum sativum*, fermented[Title/Abstract])) OR (*Polypodium vulgare*, fermented[Title/Abstract])) OR (*Prunus fruticans* weihe, fermented[Title/Abstract])) OR (*Prunus armeniaca*, fermented[Title/Abstract])) OR (*Prunus avium*, fermented[Title/Abstract])) OR (*Prunus cerasifera*, fermented[Title/Abstract])) OR (*Prunus cerasus*, fermented[Title/Abstract])) OR (*Prunus domestica*, fermented[Title/Abstract])) OR (*Prunus padus*, fermented[Title/Abstract])) OR (*Prunus spinosa*, fermented[Title/Abstract])) OR (*Primula veris*, fermented[Title/Abstract])) OR (*Pteridium aquilinum*, fermented[Title/Abstract])) OR (*Pyrus communis*, fermented[Title/Abstract])) OR (*Pyrus elaeagnifolia*, fermented[Title/Abstract])) OR (*Pyrus pyraeaster*, fermented[Title/Abstract])) OR (*Quercus robur*, fermented[Title/Abstract])) OR (*Ribes alpinum*, fermented[Title/Abstract])) OR (*Ribes nigrum*, fermented[Title/Abstract])) OR (*Ribes rubrum*, fermented[Title/Abstract])) OR (*Ribes spicatum* robson, fermented[Title/Abstract])) OR (*Ribes uva-crispa*, fermented[Title/Abstract])) OR (*Rubus caesius*, fermented[Title/Abstract])) OR (*Rubus fruticosus*, fermented[Title/Abstract])) OR (*Rubus idaeus*, fermented[Title/Abstract])) OR (*Rubus saxatilis*, fermented[Title/Abstract])) OR (*Rubus* subgenus *rubus*, fermented[Title/Abstract])) OR (*Robinia pseudoacacia*, fermented[Title/Abstract])) OR (*Rosa canina*, fermented[Title/Abstract])) OR (*Rosa*, fermented[Title/Abstract])) OR (*Sambucus ebulus*, fermented[Title/Abstract])) OR (*Sambucus nigra*, fermented[Title/Abstract])) OR (*Secale cereale*, fermented[Title/Abstract])) OR (*Solanum lycopersicum*, fermented[Title/Abstract])) OR (*Solanum tuberosum*, fermented[Title/Abstract])) OR (*Sorbus aucuparia*, fermented[Title/Abstract])) OR (*Sorbus domestica*, fermented[Title/Abstract])) OR (*Sorbus intermedia*, fermented[Title/Abstract])) OR (*Sorbus rupicola*, fermented[Title/Abstract])) OR (*Sorbus torminalis*, fermented[Title/Abstract])) OR (*Tanacetum vulgare*, fermented[Title/Abstract])) OR (*Taraxacum*, fermented[Title/Abstract])) OR (*Tilia tomentosa* moench, fermented[Title/Abstract])) OR (*Triticum*, fermented[Title/Abstract])) OR (*Vaccinium myrtillus*, fermented[Title/Abstract])) OR (*Vaccinium oxycoccos*, fermented[Title/Abstract])) OR (*Vaccinium uliginosum*, fermented[Title/Abstract])) OR (*Vaccinium vitis-idaea*, fermented[Title/Abstract])) OR (*Viburnum opulus*, fermented[Title/Abstract])) OR (*Vicia faba*, fermented[Title/Abstract])) OR (*Vitis*, fermented[Title/Abstract])) OR (*Zea mays*, fermented[Title/Abstract]))



(Learning[Title/Abstract])) OR (Learning ability[Title/Abstract])) OR (Memory[Title/Abstract])) OR (Memory decline[Title/Abstract])) OR (Memory defects[Title/Abstract])) OR (Memory deficit[Title/Abstract])) OR (Memory deficits[Title/Abstract])) OR (Memory disorder[Title/Abstract])) OR (Memory disorders, age related[Title/Abstract])) OR (Memory disorders, age-related[Title/Abstract])) OR (Memory disorder, semantic[Title/Abstract])) OR (Memory disorder, spatial[Title/Abstract])) OR (Memory disorders, spatial[Title/Abstract])) OR (Memory for designs test[Title/Abstract])) OR (Memory impairment[Title/Abstract])) OR (Memory loss[Title/Abstract])) OR (Memory losses[Title/Abstract])) OR (Familial dementia[Title/Abstract])) OR (Familial dementias[Title/Abstract])

|    |                                                                                                                                                                                                                                                                                                                                                                                                                                                                                                                                                                                                                                                                                                                                                                                                                                                                                                                                                                                                                                                                                                                                                                                                                                                                                                                                                                                                                                                                                                                                                                                                                                                                                                                                                                                                                                                                                                                                                                                                                                                                                                                                                                                                                                                                                                                                                                                                                                                                                                                                                                                                                                                                                                                                                                                                                                                                                                                                                                                                                   |                                                     |
|----|-------------------------------------------------------------------------------------------------------------------------------------------------------------------------------------------------------------------------------------------------------------------------------------------------------------------------------------------------------------------------------------------------------------------------------------------------------------------------------------------------------------------------------------------------------------------------------------------------------------------------------------------------------------------------------------------------------------------------------------------------------------------------------------------------------------------------------------------------------------------------------------------------------------------------------------------------------------------------------------------------------------------------------------------------------------------------------------------------------------------------------------------------------------------------------------------------------------------------------------------------------------------------------------------------------------------------------------------------------------------------------------------------------------------------------------------------------------------------------------------------------------------------------------------------------------------------------------------------------------------------------------------------------------------------------------------------------------------------------------------------------------------------------------------------------------------------------------------------------------------------------------------------------------------------------------------------------------------------------------------------------------------------------------------------------------------------------------------------------------------------------------------------------------------------------------------------------------------------------------------------------------------------------------------------------------------------------------------------------------------------------------------------------------------------------------------------------------------------------------------------------------------------------------------------------------------------------------------------------------------------------------------------------------------------------------------------------------------------------------------------------------------------------------------------------------------------------------------------------------------------------------------------------------------------------------------------------------------------------------------------------------------|-----------------------------------------------------|
| 11 | <p>(("animal experimentation"[MeSH Terms] OR "models, animal"[MeSH Terms] OR "invertebrates"[MeSH Terms] OR "Animals"[Mesh:noexp] OR "animal population groups"[MeSH Terms] OR "chordata"[MeSH Terms:noexp] OR "chordata, nonvertebrate"[MeSH Terms] OR "vertebrates"[MeSH Terms:noexp] OR "amphibians"[MeSH Terms] OR "birds"[MeSH Terms] OR "fishes"[MeSH Terms] OR "reptiles"[MeSH Terms] OR "mammals"[MeSH Terms:noexp] OR "primates"[MeSH Terms:noexp] OR "artiodactyla"[MeSH Terms] OR "carnivora"[MeSH Terms] OR "cetacea"[MeSH Terms] OR "chiroptera"[MeSH Terms] OR "elephants"[MeSH Terms] OR "hyraxes"[MeSH Terms] OR "insectivora"[MeSH Terms] OR "lagomorpha"[MeSH Terms] OR "marsupialia"[MeSH Terms] OR "monotremata"[MeSH Terms] OR "perissodactyla"[MeSH Terms] OR "rodentia"[MeSH Terms] OR "scandentia"[MeSH Terms] OR "sirenia"[MeSH Terms] OR "xenarthra"[MeSH Terms] OR "haplorhini"[MeSH Terms:noexp] OR "strepsirhini"[MeSH Terms] OR "platyrrhini"[MeSH Terms] OR "tarsii"[MeSH Terms] OR "catarrhini"[MeSH Terms:noexp] OR "cercopithecidae"[MeSH Terms] OR "hylobatidae"[MeSH Terms] OR "hominidae"[MeSH Terms:noexp] OR "gorilla gorilla"[MeSH Terms] OR "pan paniscus"[MeSH Terms] OR "pan troglodytes"[MeSH Terms] OR "pongo pygmaeus"[MeSH Terms]) OR ((animals[tiab] OR animal[tiab] OR mice[Tiab] OR mus[Tiab] OR mouse[Tiab] OR murine[Tiab] OR woodmouse[tiab] OR rats[Tiab] OR rat[Tiab] OR murinae[Tiab] OR muridae[Tiab] OR cottonrat[tiab] OR cottonrats[tiab] OR hamster[tiab] OR hamsters[tiab] OR cricetinae[tiab] OR rodentia[Tiab] OR rodent[Tiab] OR rodents[Tiab] OR pigs[Tiab] OR pig[Tiab] OR swine[tiab] OR swines[tiab] OR piglets[tiab] OR piglet[tiab] OR boar[tiab] OR boars[tiab] OR "sus scrofa"[tiab] OR ferrets[tiab] OR ferret[tiab] OR polecat[tiab] OR polecats[tiab] OR "mustela putorius"[tiab] OR "guinea pigs"[Tiab] OR "guinea pig"[Tiab] OR cavia[Tiab] OR callithrix[Tiab] OR marmoset[Tiab] OR marmosets[Tiab] OR cebuella[Tiab] OR hapale[Tiab] OR octodon[Tiab] OR chinchilla[Tiab] OR chinchillas[Tiab] OR gerbillinae[Tiab] OR gerbil[Tiab] OR gerbils[Tiab] OR jird[Tiab] OR jirds[Tiab] OR merione[Tiab] OR meriones[Tiab] OR rabbits[Tiab] OR rabbit[Tiab] OR hares[Tiab] OR hare[Tiab] OR diptera[Tiab] OR flies[Tiab] OR fly[Tiab] OR dipteral[Tiab] OR drosophila[Tiab] OR drosophilidae[Tiab] OR cats[Tiab] OR cat[Tiab] OR carus[Tiab] OR felis[Tiab] OR nematoda[Tiab] OR nematode[Tiab] OR nematodes[Tiab] OR sipunculida[Tiab] OR dogs[Tiab] OR dog[Tiab] OR canine[Tiab] OR canines[Tiab] OR canis[Tiab] OR sheep[Tiab] OR sheeps[Tiab] OR mouflon[Tiab] OR mouflons[Tiab] OR ovis[Tiab] OR goats[Tiab] OR goat[Tiab] OR capra[Tiab] OR capras[Tiab] OR rupicapra[Tiab] OR rupicapras[Tiab] OR chamois[Tiab] OR haplorhini[Tiab] OR monkey[Tiab] OR monkeys[Tiab] OR anthropoidea[Tiab] OR anthropoids[Tiab] OR saguinus[Tiab] OR tamarin[Tiab] OR tamarins[Tiab] OR leontopithecus[Tiab] OR hominidae[Tiab] OR ape[Tiab]</p> | 7,746,911<br>From<br>Hooijma<br>ns et al.,<br>2010) |
|----|-------------------------------------------------------------------------------------------------------------------------------------------------------------------------------------------------------------------------------------------------------------------------------------------------------------------------------------------------------------------------------------------------------------------------------------------------------------------------------------------------------------------------------------------------------------------------------------------------------------------------------------------------------------------------------------------------------------------------------------------------------------------------------------------------------------------------------------------------------------------------------------------------------------------------------------------------------------------------------------------------------------------------------------------------------------------------------------------------------------------------------------------------------------------------------------------------------------------------------------------------------------------------------------------------------------------------------------------------------------------------------------------------------------------------------------------------------------------------------------------------------------------------------------------------------------------------------------------------------------------------------------------------------------------------------------------------------------------------------------------------------------------------------------------------------------------------------------------------------------------------------------------------------------------------------------------------------------------------------------------------------------------------------------------------------------------------------------------------------------------------------------------------------------------------------------------------------------------------------------------------------------------------------------------------------------------------------------------------------------------------------------------------------------------------------------------------------------------------------------------------------------------------------------------------------------------------------------------------------------------------------------------------------------------------------------------------------------------------------------------------------------------------------------------------------------------------------------------------------------------------------------------------------------------------------------------------------------------------------------------------------------------|-----------------------------------------------------|

OR apes[Tiab] OR "pan paniscus"[Tiab] OR bonobo[Tiab] OR bonobos[Tiab] OR "pan troglodytes"[Tiab] OR gibbon[Tiab] OR gibbons[Tiab] OR siamang[Tiab] OR siamangs[Tiab] OR nomascus[Tiab] OR symphalangus[Tiab] OR chimpanzee[Tiab] OR chimpanzees[Tiab] OR prosimian[Tiab] OR prosimians[Tiab] OR "bush baby"[Tiab] OR bush babies[Tiab] OR galagos[Tiab] OR galago[Tiab] OR pongidae[Tiab] OR gorilla[Tiab] OR gorillas[Tiab] OR "pongo pygmaeus"[Tiab] OR orangutan[Tiab] OR orangutans[Tiab] OR lemur[Tiab] OR lemurs[Tiab] OR lemuridae[Tiab] OR horse[Tiab] OR horses[Tiab] OR equus[Tiab] OR cow[Tiab] OR calf[Tiab] OR bull[Tiab] OR chicken[Tiab] OR chickens[Tiab] OR gallus[Tiab] OR quail[Tiab] OR bird[Tiab] OR birds[Tiab] OR quails[Tiab] OR poultry[Tiab] OR poultries[Tiab] OR fowl[Tiab] OR fowls[Tiab] OR reptile[Tiab] OR reptilia[Tiab] OR reptiles[Tiab] OR snakes[Tiab] OR snake[Tiab] OR lizard[Tiab] OR lizards[Tiab] OR alligator[Tiab] OR alligators[Tiab] OR crocodile[Tiab] OR crocodiles[Tiab] OR turtle[Tiab] OR turtles[Tiab] OR amphibian[Tiab] OR amphibians[Tiab] OR amphibia[Tiab] OR frog[Tiab] OR frogs[Tiab] OR bombina[Tiab] OR salientia[Tiab] OR toad[Tiab] OR toads[Tiab] OR "epidalea calamita"[Tiab] OR salamander[Tiab] OR salamanders[Tiab] OR eel[Tiab] OR eels[Tiab] OR fish[Tiab] OR fishes[Tiab] OR pisces[Tiab] OR catfish[Tiab] OR catfishes[Tiab] OR siluriformes[Tiab] OR arius[Tiab] OR heteropneustes[Tiab] OR sheatfish[Tiab] OR perch[Tiab] OR perches[Tiab] OR percidae[Tiab] OR perca[Tiab] OR trout[Tiab] OR trouts[Tiab] OR char[Tiab] OR chars[Tiab] OR salvelinus[Tiab] OR minnow[Tiab] OR cyprinidae[Tiab] OR carps[Tiab] OR carp[Tiab] OR zebrafish[Tiab] OR zebrafishes[Tiab] OR goldfish[Tiab] OR goldfishes[Tiab] OR guppy[Tiab] OR guppies[Tiab] OR chub[Tiab] OR chubs[Tiab] OR tinca[Tiab] OR barbels[Tiab] OR barbus[Tiab] OR pimephales[Tiab] OR promelas[Tiab] OR "poecilia reticulata"[Tiab] OR mullet[Tiab] OR mullets[Tiab] OR eel[Tiab] OR eels[Tiab] OR seahorse[Tiab] OR seahorses[Tiab] OR mugil curema[Tiab] OR atlantic cod[Tiab] OR shark[Tiab] OR sharks[Tiab] OR catshark[Tiab] OR anguilla[Tiab] OR salmonid[Tiab] OR salmonids[Tiab] OR whitefish[Tiab] OR whitefishes[Tiab] OR salmon[Tiab] OR salmons[Tiab] OR sole[Tiab] OR solea[Tiab] OR lamprey[Tiab] OR lampreys[Tiab] OR pumpkinseed[Tiab] OR sunfish[Tiab] OR sunfishes[Tiab] OR tilapia[Tiab] OR tilapias[Tiab] OR turbot[Tiab] OR turbot[Tiab] OR flatfish[Tiab] OR flatfishes[Tiab] OR sciuridae[Tiab] OR squirrel[Tiab] OR squirrels[Tiab] OR chipmunk[Tiab] OR chipmunks[Tiab] OR suslik[Tiab] OR susliks[Tiab] OR vole[Tiab] OR voles[Tiab] OR lemming[Tiab] OR lemmings[Tiab] OR muskrat[Tiab] OR muskrats[Tiab] OR lemmus[Tiab] OR otter[Tiab] OR otters[Tiab] OR marten[Tiab] OR martens[Tiab] OR martes[Tiab] OR weasel[Tiab] OR badger[Tiab] OR badgers[Tiab] OR ermine[Tiab] OR mink[Tiab] OR minks[Tiab] OR sable[Tiab] OR sables[Tiab] OR gulo[Tiab] OR gulos[Tiab] OR

wolverine[Tiab] OR wolverines[Tiab] OR mustela[Tiab] OR llama[Tiab] OR llamas[Tiab] OR alpaca[Tiab] OR alpacas[Tiab] OR camelid[Tiab] OR camelids[Tiab] OR guanaco[Tiab] OR guanacos[Tiab] OR chiroptera[Tiab] OR chiropteras[Tiab] OR bat[Tiab] OR bats[Tiab] OR fox[Tiab] OR foxes[Tiab] OR iguana[Tiab] OR iguanas[Tiab] OR xenopus laevis[Tiab] OR parakeet[Tiab] OR parakeets[Tiab] OR parrot[Tiab] OR parrots[Tiab] OR donkey[Tiab] OR donkeys[Tiab] OR mule[Tiab] OR mules[Tiab] OR zebra[Tiab] OR zebras[Tiab] OR shrew[Tiab] OR shrews[Tiab] OR bison[Tiab] OR bisons[Tiab] OR buffalo[Tiab] OR buffaloes[Tiab] OR deer[Tiab] OR deers[Tiab] OR bear[Tiab] OR bears[Tiab] OR panda[Tiab] OR pandas[Tiab] OR "wild hog"[Tiab] OR "wild boar"[Tiab] OR fitchew[Tiab] OR fitch[Tiab] OR beaver[Tiab] OR beavers[Tiab] OR jerboa[Tiab] OR jerboas[Tiab] OR capybara[Tiab] OR capybaras[Tiab] OR canine [tiab] OR bovine [tiab] OR porcine [tiab] OR hog [tiab] OR hogs [tiab]) NOT medline[sb])



|    |                                                    |         |
|----|----------------------------------------------------|---------|
| 12 | #1 OR #2 OR #3 OR #4 OR #5 OR #6 OR #7 OR #8 OR #9 | 128,128 |
| 13 | #10 AND #11 AND #12                                | 343     |

Embase (under the OvidSP search platform; WoltersKluwer Health, 20230216) 1,220

| # | Search                                                                                                                                                                                                                                                                                                                                                                                                                                                                                                                                                                                                                                                                                                                                                                                                                                                                                                                                                                                                                                                                                                                                                                                                                                                                                                                                                                                                                                                                                                                                                                                                                                                                                                                                                                                                                                                                 | Results |
|---|------------------------------------------------------------------------------------------------------------------------------------------------------------------------------------------------------------------------------------------------------------------------------------------------------------------------------------------------------------------------------------------------------------------------------------------------------------------------------------------------------------------------------------------------------------------------------------------------------------------------------------------------------------------------------------------------------------------------------------------------------------------------------------------------------------------------------------------------------------------------------------------------------------------------------------------------------------------------------------------------------------------------------------------------------------------------------------------------------------------------------------------------------------------------------------------------------------------------------------------------------------------------------------------------------------------------------------------------------------------------------------------------------------------------------------------------------------------------------------------------------------------------------------------------------------------------------------------------------------------------------------------------------------------------------------------------------------------------------------------------------------------------------------------------------------------------------------------------------------------------|---------|
| 1 | exp fermented product/ or exp fermented beverage/ or exp fermented soybean/ or exp kimchi/ or exp sauerkraut/                                                                                                                                                                                                                                                                                                                                                                                                                                                                                                                                                                                                                                                                                                                                                                                                                                                                                                                                                                                                                                                                                                                                                                                                                                                                                                                                                                                                                                                                                                                                                                                                                                                                                                                                                          | 47,618  |
| 2 | (Apple vinegar or Avena sativa or Baxhin or Bexhin or Fruit pickle or Gherkins or Gruel or Kali or Kiisel or Kile or Kimchi or Kisiel or Kisla or Kisla vara or Kvass or Lacto-fermented cucumbers or Lacto-fermented gruel or Lacto-fermented hogweed soup or Miso or Oat kile or Pickle or Rice vinegar or Sarma or Sauerkraut or Soup or Sour drink or Sour beverage or Soy sauce or Taar or Traditional fermented food or Traditional fermented beverage or Turshiena chorba or Vinegar or Ang-kak or Boza or Busa or Ben-saalga or Dosa or Enjera or Injera or Gowe or Hussuwa or Idli or Jalebi or Kenkey or Khamak or Kao-mak or Kunu-zaki or Kisra or Koko or Lao-chao or Mawe or Mbege or Ogi or Pito or Poto poto or Pozol or Puto or Rabadi or Selroti or Sourdough or Tape Ketan or Togwa or Tarhana or Uji or Burong mustala or Fermented cupers or Fermented cucumbers or Dha muoi or Ekung or Eup or Fu-tsai or Goyang or Gundruk or Herring or Hom-dong or Jiang-gua or Jiang-sun or Khalpi or Naw-mai-dong or Mesu or Oiji or Fermented olives or Pak-gard-dong or Pak-sian-dong or Paocai or Sayur asin or Soibum or Soidon or Sinki or Suan-cai or Suan-tsai or Sunki or Takuanzuke or Tuaithur or Bekang or Bhallae or Bikalga or Chungkokjang or Jeonkukjang or Cheonggukjang or Dawadawa or Dhokla or Douchi or Doenjang or Furu or Gochujang or Hawaiijar or Iru or Kanjang or Kawal or Kecap or Ketjap or Kinda or Kinema or Maseura or Meitauza or Meju or Natto or Oncom Hitam or Black Oncom or Oncom Merah or Orange Oncom or Ogiri or Ogili or Okpehe or Soumbala or Shoyu or Sufu or Tauco or Tempe or Thua nao or Tungrymbai or Ugba or Wari or Yandou or Chikwangue or Cingwada or Fufu or Gari or Lafun or Konkonte or Tape or Tapai Ubi or Bushera Obushera or Ikii or Koozh or Mahewu or Swazi or Ting or Garri or Siljo).ti,ab,kw. | 47,714  |
| 3 | ((Bacillus or Bacillus amyloliquefaciens or Bacillus subtilis or Bifidobacterium or Enterococcus faecalis or Enterococcus faecium or LAB or Lactiplantibacillus plantarum or Lactic acid bacteria or Lactobacillus or Lactococcus or Latilactobacillus sakei or Leuconostoc or Levilactobacillus brevis or Limosilactobacillus Fermentum or Fungus or Mold or Aspergillus or Oenococcus or Pediococcus or Red mold-fermented or Streptococcus or Rhizopus or Saccharomyces or Streptococcus thermophilus or Weisella or Monascus or Mucor or Lactobacillus bulgaricus or Weisella confusa or Lactobacillus amylolyticus or Lactobacillus helveticus or Lactobacillus acidophilus or Lactobacillus coprophilus or Lactococcus raffinolactis or Leuconostoc mesenteroides or Lacticaseibacillus paracasei or Lactobacillus delbrueckii or Weissella confusa or Lacticaseibacillus rhamnosus or Pediococcus or                                                                                                                                                                                                                                                                                                                                                                                                                                                                                                                                                                                                                                                                                                                                                                                                                                                                                                                                                            | 27,019  |

|   |                                                                                                                                                                                                                                                                                                                                                                                                                                                                                                                                                                                                                                                                                                                                                                                                                                                                                                                                                                                                                                                                                                                                                                                                                                                                                                                                                                                                                                                                                                                                                                                                                                                                                                                                                                                                                                                                                                                                                                                                                                                                                                                                                                                                                                                                                                                                               |        |
|---|-----------------------------------------------------------------------------------------------------------------------------------------------------------------------------------------------------------------------------------------------------------------------------------------------------------------------------------------------------------------------------------------------------------------------------------------------------------------------------------------------------------------------------------------------------------------------------------------------------------------------------------------------------------------------------------------------------------------------------------------------------------------------------------------------------------------------------------------------------------------------------------------------------------------------------------------------------------------------------------------------------------------------------------------------------------------------------------------------------------------------------------------------------------------------------------------------------------------------------------------------------------------------------------------------------------------------------------------------------------------------------------------------------------------------------------------------------------------------------------------------------------------------------------------------------------------------------------------------------------------------------------------------------------------------------------------------------------------------------------------------------------------------------------------------------------------------------------------------------------------------------------------------------------------------------------------------------------------------------------------------------------------------------------------------------------------------------------------------------------------------------------------------------------------------------------------------------------------------------------------------------------------------------------------------------------------------------------------------|--------|
|   | <p>Leuconostoc or Weissella or Streptococcus lutetiensis or Clostridium perfringens or Pediococcus pentosaceus or Lactiplantibacillus paraplantarum or Pediococcus acidilacti or Lactococcus lactis or Lactobacillus gasserii or Enterococcus or Escherichia coli or Bacillus or Limosilactobacillus reuteri or Bifidobacterium or Leuconostoc pseudomesenteroides or Weissella cibaria or Lactobacillus casei or Lactobacillus bulgaricus or Leuconostoc citreum or Lactobacillus harbinensis or Lactobacillus coryniformis or Lentilactobacillus parabuchneri or Streptococcus faecalis or Pediococcus cerevisiae or Lactobacillus delbrueckii or Micrococcus or Lactobacillus pentosus or Leu mesenteroides or Streptococcus thermophilus or Bacillus lactis or Bacillus longum or Bacillus infantis or Lacticaseibacillus mesenteroides or Lacticaseibacillus cremoris or Lacticaseibacillus lactis or Bifidobacterium lactis or Clostridium or Butyrivibrio or Escherichia or Enterobacter or Salmonella or Klebsiella or Shigella or Propionibacter or Veilonella or Bacteroides or Clostridia or Acetobacter or Gluconobacter or Gluconacetobacter or Halomonas or Hafnia or Tatumella or Zymomonas or Brachybacter or Microbacter or Brevibacter or Corynebacter or Micrococcus or Kocuria or Arthrobacter or Propionibacter or Streptomyces or Bifidobacter or Gemella or Jeotgalicoccus or Carnobacter or Enterococcus or Tetragenococcus or Vagococcus or Weissella or Staphylococcus or Actinomucor or Amylomyces or Bjerkandera or Brettanomyces or Candida or Cryptococcus or Cyberlindnera or Cystofilobasidium or Debaryomyces or Dekkera or Fusarium or Galactomyces or Geotrichum or Cladosporium or Guehomyces or Hanseniaspora or Hansenula or Hyphopichia or Issatchenkia or Kazachstania or Kluyveromyces or Lecanicillium or Lachancea or Metschnikowia or Neurospora or Penicillium or Pichia or Rhodotorula or Rhodosporidium or Saccharomycodes or Saccharomycopsis or Schizosaccharomyces or Schwanniomyces or Sporobolomyces or Scopulariopsis or Sporendonema or Starmerella or Torulaspora or Trametes or Trichosporon or Trigonopsis or Torulopsis or Ustilago or Wickerhamomyces or Yarrowia or Zygosaccharomyces or Zygorulaspora) adj15 (fermented or fermentation or ferment or fermenting)).ti,ab,kw.</p> |        |
| 4 | <p>((Apples or Blackberries or Cabbage or Cucumber or Gentian roots or Juniper berries or Lingonberries or Medlars or Oat or Pears or Plums or Radish or Raspberries or Rye or Sloe or Spicy red pepper or Wild apples or Sorghum or Maize or Rice or Millet or cassava or Pearl millet or Wheat or green gram or Tef or Barley or finger millet mal or Soybean or Black lentils or Black gram or opium seeds or walnut or Phaselus mango or Lentil or Bambara groundnut or locust bean or Chickpeas or red pepper or Cassia or Black soybean or Bengal gram or Red gram or Castor oil seed or melon seed or groundnut or fluted pumpkin seed or African oil bean or Hordeum vulgare or Pea or Linseed or Pisum sativum or Linum usitatissimum or Cowpea or Avena sativa or Pennisetum glaucum or Oryza sativa or Sorghum bicolor or Eragrostis tef or Pentaclethra macrophylla or African yam bean or Sphenostylis stenocarpa or</p>                                                                                                                                                                                                                                                                                                                                                                                                                                                                                                                                                                                                                                                                                                                                                                                                                                                                                                                                                                                                                                                                                                                                                                                                                                                                                                                                                                                                         | 10,736 |

|   |                                                                                                                                                                                                                                                                                                                                                                                                                                                                                                                                                                                                                                                                                                                                                                                                                                                                                                                                                                                                                                                                                                                                                                                                                                                                                                                                                                                                                                                                                                                                                                                                                                                                                       |     |
|---|---------------------------------------------------------------------------------------------------------------------------------------------------------------------------------------------------------------------------------------------------------------------------------------------------------------------------------------------------------------------------------------------------------------------------------------------------------------------------------------------------------------------------------------------------------------------------------------------------------------------------------------------------------------------------------------------------------------------------------------------------------------------------------------------------------------------------------------------------------------------------------------------------------------------------------------------------------------------------------------------------------------------------------------------------------------------------------------------------------------------------------------------------------------------------------------------------------------------------------------------------------------------------------------------------------------------------------------------------------------------------------------------------------------------------------------------------------------------------------------------------------------------------------------------------------------------------------------------------------------------------------------------------------------------------------------|-----|
|   | <p>Vigna subterranea or Phaseolus vulgaris or Vigna unguiculata or Black-eyed pea or Cicer arietinum or Common bean or Vigna carilla or Guanacaste or Enterolobium cyclocarpum or Horse gram or Macrotyloma uniflorum or Kidney bean or Lens culinaris or Lima bean or Phaseolus lunatus or Lupin or Lupinus albus or Lupinus luteus or Lupinus angustifolius or Lyon bean or Mucuna cochinchinensis or Mahogany Bean or Afzelia africana or Mung bean or Vigna radiata or Pigeon pea or Cajanus cajan or Red bean or Phaseolus angularis or Glycine max or Tamarind or Tamarindus indica or Vigna racemosa or Mulberry or Morus nigra or Pomegranate or Punica granatum or Cashew apple or Anacardium occidentale or Cantaloupe melon or Cucumis melo or Apple or Noni or Morinda citrifolia or Pear or Pyrus communis or Cherry or Litchi or Litchi chinensis or Orange or Papaya or Carica papaya or Grape or Cranberry or Prickly pear or Phyllanthus emblica or Jujube or Ziziphus jujuba or Feijoa or Feijoa sellowiana or Tomato or Lycopersicon esculentum or Cactus pear or Opuntia ficus-indica or Carrot or Potato or Solanum tuberosum or Beetroot or Beta vulgaris or Lycopersicum esculentum or haw or Mustard or Cupers or Cucumbers or beet or eggplant or Bamboo shoot or Red onion or green onion or hot pepper or ginger or Olive or Gynandropis pentaphylla or Turnip or Roselle or Peanut or tapioca or Melon Seeds or castor oil seeds or pumpkin bean or sesame or Prosopis africana or Pentaclethra macrophylla or Ragi) adj15 (fermented or fermentation or ferment or fermenting)).ti,ab,kw.</p>                                                            |     |
| 5 | <p>((Acer platanoides or Aegopodium podagraria or Alcea rosea or Allium or Allium cepa or Allium sativum or Allium schoenoprasum or Anethum graveolens or Apium graveolens or Arctium lappa or Armoracia rusticana or Artemisia absinthium or Atriplex or Avena sativa or Berberis vulgaris or Beta vulgaris or Betula pendula or Betula pubescens or Brassica cretica or Brassica nigra or Brassica oleracea or Brassica rapa or Bromus secalinus or Capsicum annuum or Carum carvi or Cicer arietinum or Citrullus lanatus or Citrus limon or Citrus sinensis or Cornelian cherries or Cornus mas or Crataegus or Cucumis melo or Cucumis sativus or Cucurbita pepo or Cyanus segetum hill or Cydonia oblonga or Daucus carota or Empetrum nigrum or Fagopyrum esculentum moench or Fagus sylvatica or Fragaria vesca or Gentiana lutea or Helianthus tuberosus or Heracleum sphondylium or Hordeum distichon or Hordeum vulgare or Humulus lupulus or Juniperus communis or Laurus nobilis or Ledum palustre or Linum usitatissimum or Maianthemum bifolium or Malus domestica or Melittis melissophyllum or Mentha or Menyanthes trifoliata or Mespilus germanica or Morus alba or Morus nigra or Myrica gale or Malus or Malus sylvestris or Panicum miliaceum or Persicaria bistorta or Phaseolus vulgaris or Pimenta dioica or Piper nigrum or Pisum sativum or Polypodium vulgare or Prunus fruticans weihe or Prunus armeniaca or Prunus avium or Prunus cerasifera or Prunus cerasus or Prunus domestica or Prunus padus or Prunus spinosa or Primula veris or Pteridium aquilinum or Pyrus communis or Pyrus elaeagnifolia or Pyrus pyraster or Quercus robur or Ribes</p> | 426 |

|   |                                                                                                                                                                                                                                                                                                                                                                                                                                                                                                                                                                                                                                                                                                                                                                                                                                                                                                                                                                                                                                                                                                                                                                                                                                                                                                                                                                                                                                                                                                                                                                                                                                                                                                                                                                                                                                                                                                                                                                                                                                                                                                                                                                            |           |
|---|----------------------------------------------------------------------------------------------------------------------------------------------------------------------------------------------------------------------------------------------------------------------------------------------------------------------------------------------------------------------------------------------------------------------------------------------------------------------------------------------------------------------------------------------------------------------------------------------------------------------------------------------------------------------------------------------------------------------------------------------------------------------------------------------------------------------------------------------------------------------------------------------------------------------------------------------------------------------------------------------------------------------------------------------------------------------------------------------------------------------------------------------------------------------------------------------------------------------------------------------------------------------------------------------------------------------------------------------------------------------------------------------------------------------------------------------------------------------------------------------------------------------------------------------------------------------------------------------------------------------------------------------------------------------------------------------------------------------------------------------------------------------------------------------------------------------------------------------------------------------------------------------------------------------------------------------------------------------------------------------------------------------------------------------------------------------------------------------------------------------------------------------------------------------------|-----------|
|   | alpinum or Ribes nigrum or Ribes rubrum or Ribes spicatum robson or Ribes uva-crispa or Rubus caesius or Rubus fruticosus or Rubus idaeus or Rubus saxatilis or Rubus subgenus rubus or Robinia pseudoacacia or Rosa canina or Rosa or Sambucus ebulus or Sambucus nigra or Secale cereale or Solanum lycopersicum or Solanum tuberosum or Sorbus aucuparia or Sorbus domestica or Sorbus intermedia or Sorbus rupicola or Sorbus torminalis or Tanacetum vulgare or Taraxacum or Tilia tomentosa moench or Triticum or Vaccinium myrtillus or Vaccinium oxycoccos or Vaccinium uliginosum or Vaccinium vitis-idaea or Viburnum opulus or Vicia faba or Vitis or Zea mays) adj15 (fermented or fermentation or ferment or fermenting)).ti,ab,kw.                                                                                                                                                                                                                                                                                                                                                                                                                                                                                                                                                                                                                                                                                                                                                                                                                                                                                                                                                                                                                                                                                                                                                                                                                                                                                                                                                                                                                           |           |
| 6 | exp alzheimer disease/ or exp brain disease/ or exp degenerative disease/ or exp dementia/ or exp alzheimer disease assessment scale/ or exp alzheimer disease vaccine/                                                                                                                                                                                                                                                                                                                                                                                                                                                                                                                                                                                                                                                                                                                                                                                                                                                                                                                                                                                                                                                                                                                                                                                                                                                                                                                                                                                                                                                                                                                                                                                                                                                                                                                                                                                                                                                                                                                                                                                                    | 2,781,620 |
| 7 | (Alzheimer Dementia or Alzheimer Dementias or Dementia, Alzheimer or Alzheimer's Disease or Dementia, Senile or Senile Dementia or Dementia, Alzheimer Type or Alzheimer Type Dementia or Alzheimer-Type Dementia or Alzheimer Type Dementia or Dementia, Alzheimer-Type or Alzheimer Type Senile Dementia or Primary Senile Degenerative Dementia or Dementia, Primary Senile Degenerative or Alzheimer Sclerosis or Sclerosis, Alzheimer or Alzheimer Syndrome or Alzheimer's Diseases or Alzheimer Diseases or Alzheimers Diseases or Senile Dementia, Alzheimer Type or Acute Confusional Senile Dementia or Senile Dementia, Acute Confusional or Dementia, Presenile or Presenile Dementia or Alzheimer Disease, Late Onset or Late Onset Alzheimer Disease or Alzheimer's Disease, Focal Onset or Focal Onset Alzheimer's Disease or Familial Alzheimer Disease or Alzheimer Disease, Familial or Familial Alzheimer Diseases or Alzheimer Disease, Early Onset or Early Onset Alzheimer Disease or Presenile Alzheimer Dementia or Cognitive damage or Cognitive decline or Cognitive declines or Cognitive disorders or Cognitive dysfunction or Cognitive dysfunctions or Cognitive failure or Cognitive frailty or Cognitive function or Cognitive functions or Cognitive function scanner or Cognitive impairment or Cognitive impairments or Cognitive impairment, mild or Cognitive impairments, mild or Cognition performance or Cognitive retention disorders or Decline, cognitive or Declines, cognitive or Deficit, memory or Deficits, memory or Dysfunction, cognitive or Dysfunctions, cognitive or Impairment, cognitive or Impairments, cognitive or Impairment, mild cognitive or Impairments, mild cognitive or Learning or Learning ability or Memory or Memory decline or Memory defects or Memory deficit or Memory deficits or Memory disorder or Memory disorders, age related or Memory disorders, age-related or Memory disorder, semantic or Memory disorder, spatial or Memory disorders, spatial or Memory for designs test or Memory impairment or Memory loss or Memory losses or Familial dementia or Familial dementias).ti,ab,kw. | 1,214,589 |

|   |                                                                                                                                                                                                                                                                                                                                                                                                                                                                                                                                                                                                                                                                                                                                                                                                                                                                                                                                                                                                                                                                                                                                                                                                                                                                                                                                                                                                                                                                                                                                                                                                                                                                                                                                                                                                                                                                                                                                                                                                                                                                                                                                                                                                                                                                                                                                                                                                                                                                                                                                                                                                                                                                                                                                                                                                                                                                                                                                                                                                                                                                                                                                                                                                                                                                                                                                                                                                                                                                                                                                                                                                                                                                                                                             |                                                   |
|---|-----------------------------------------------------------------------------------------------------------------------------------------------------------------------------------------------------------------------------------------------------------------------------------------------------------------------------------------------------------------------------------------------------------------------------------------------------------------------------------------------------------------------------------------------------------------------------------------------------------------------------------------------------------------------------------------------------------------------------------------------------------------------------------------------------------------------------------------------------------------------------------------------------------------------------------------------------------------------------------------------------------------------------------------------------------------------------------------------------------------------------------------------------------------------------------------------------------------------------------------------------------------------------------------------------------------------------------------------------------------------------------------------------------------------------------------------------------------------------------------------------------------------------------------------------------------------------------------------------------------------------------------------------------------------------------------------------------------------------------------------------------------------------------------------------------------------------------------------------------------------------------------------------------------------------------------------------------------------------------------------------------------------------------------------------------------------------------------------------------------------------------------------------------------------------------------------------------------------------------------------------------------------------------------------------------------------------------------------------------------------------------------------------------------------------------------------------------------------------------------------------------------------------------------------------------------------------------------------------------------------------------------------------------------------------------------------------------------------------------------------------------------------------------------------------------------------------------------------------------------------------------------------------------------------------------------------------------------------------------------------------------------------------------------------------------------------------------------------------------------------------------------------------------------------------------------------------------------------------------------------------------------------------------------------------------------------------------------------------------------------------------------------------------------------------------------------------------------------------------------------------------------------------------------------------------------------------------------------------------------------------------------------------------------------------------------------------------------------------|---------------------------------------------------|
| 8 | <p>exp animal experiment/ or exp animal model/ or exp experimental animal/ or exp transgenic animal/ or exp male animal/ or exp female animal/ or exp juvenile animal/ or animal/ or chordata/ or vertebrate/ or tetrapod/ or exp fish/ or amniote/ or exp amphibia/ or mammal/ or exp reptile/ or exp sauropsid/ or therian/ or exp monotremate/ or placental mammals/ or exp marsupial/ or Euarchontoglires/ or exp Afrotheria/ or exp Boreoeutheria/ or exp Laurasiatheria/ or exp Xenarthra/ or primate/ or exp Dermoptera/ or exp Glires/ or exp Scandentia/ or Haplorhini/ or exp prosimian/ or simian/ or exp tarsiiiform/ or Catarrhini/ or exp Platyrrhini/ or ape/ or exp Cercopithecidae/ or hominid/ or exp hylobatidae/ or exp chimpanzee/ or exp gorilla/ or exp orang utan/ or (animal or animals or pisces or fish or fishes or catfish or catfishes or sheatfish or silurus or arius or heteropneustes or clarias or gariepinus or fathead minnow or fathead minnows or pimephales or promelas or cichlidae or trout or trouts or char or chars or salvelinus or salmo or oncorhynchus or guppy or guppies or millionfish or poecilia or goldfish or goldfishes or carassius or auratus or mullet or mullets or mugil or curema or shark or sharks or cod or cods or gadus or morhua or carp or carps or cyprinus or carpio or killifish or eel or eels or anguilla or zander or sander or lucioperca or stizostedion or turbot or turbots or psetta or flatfish or flatfishes or plaice or pleuronectes or platessa or tilapia or tilapias or oreochromis or sarotherodon or common sole or dover sole or solea or zebrafish or zebrafishes or danio or rerio or seabass or dicentrarchus or labrax or morone or lamprey or lampreys or petromyzon or pumpkinseed or pumpkinseeds or lepomis or gibbosus or herring or clupea or harengus or amphibia or amphibian or amphibians or anura or salientia or frog or frogs or rana or toad or toads or bufo or xenopus or laevis or bombina or epidalea or calamita or salamander or salamanders or newt or newts or triturus or reptilia or reptile or reptiles or bearded dragon or pogona or vitticeps or iguana or iguanas or lizard or lizards or anguis fragilis or turtle or turtles or snakes or snake or aves or bird or birds or quail or quails or coturnix or bobwhite or colinus or virginianus or poultry or poultries or fowl or fowls or chicken or chickens or gallus or zebra finch or taeniopygia or guttata or canary or canaries or serinus or canaria or parakeet or parakeets or grasskeet or parrot or parrots or psittacine or psittacines or shelduck or tadorna or goose or geese or branta or leucopsis or woodlark or lullula or flycatcher or ficedula or hypoleuca or dove or doves or geopelia or cuneata or duck or ducks or greylag or graylag or anser or harrier or circus pygargus or red knot or great knot or calidris or canutus or godwit or limosa or lapponica or meleagris or gallopavo or jackdaw or corvus or monedula or ruff or philomachus or pugnax or lapwing or peewit or plover or vanellus or swan or cygnus or columbianus or bewickii or gull or chroicocephalus or ridibundus or albifrons or great tit or parus or aythya or fuligula or streptopelia or risoria or spoonbill or platalea or leucorodia or blackbird or turdus or merula or blue tit or cyanistes or pigeon or pigeons or columba or pintail or anas or starling or sturnus or owl or athene noctua or pochard or ferina or cockatiel or nymphicus or hollandicus or skylark or alauda or tern or sterna or teal or crecca or oystercatcher or haematopus or ostralegus or shrew or shrews or sorex or araneus or crocidura or</p> | <p>8,025,793<br/>From (de Vries et al., 2011)</p> |
|---|-----------------------------------------------------------------------------------------------------------------------------------------------------------------------------------------------------------------------------------------------------------------------------------------------------------------------------------------------------------------------------------------------------------------------------------------------------------------------------------------------------------------------------------------------------------------------------------------------------------------------------------------------------------------------------------------------------------------------------------------------------------------------------------------------------------------------------------------------------------------------------------------------------------------------------------------------------------------------------------------------------------------------------------------------------------------------------------------------------------------------------------------------------------------------------------------------------------------------------------------------------------------------------------------------------------------------------------------------------------------------------------------------------------------------------------------------------------------------------------------------------------------------------------------------------------------------------------------------------------------------------------------------------------------------------------------------------------------------------------------------------------------------------------------------------------------------------------------------------------------------------------------------------------------------------------------------------------------------------------------------------------------------------------------------------------------------------------------------------------------------------------------------------------------------------------------------------------------------------------------------------------------------------------------------------------------------------------------------------------------------------------------------------------------------------------------------------------------------------------------------------------------------------------------------------------------------------------------------------------------------------------------------------------------------------------------------------------------------------------------------------------------------------------------------------------------------------------------------------------------------------------------------------------------------------------------------------------------------------------------------------------------------------------------------------------------------------------------------------------------------------------------------------------------------------------------------------------------------------------------------------------------------------------------------------------------------------------------------------------------------------------------------------------------------------------------------------------------------------------------------------------------------------------------------------------------------------------------------------------------------------------------------------------------------------------------------------------------------------|---------------------------------------------------|

|    |                                                                                                                                                                                                                                                                                                                                                                                                                                                                                                                                                                                                                                                                                                                                                                                                                                                                                                                                                                                                                                                                                                                                                                                                                                                                                                                                                                                                                                                                                                                                                                                                                                                                                                                                                                                                                                                                                                                                                                                                                                                                                                                                                                                                                                                                                                                                                                                                                                                                                                                                                                                                                                                                                                                                                                                                                                                                                                                                                                               |           |
|----|-------------------------------------------------------------------------------------------------------------------------------------------------------------------------------------------------------------------------------------------------------------------------------------------------------------------------------------------------------------------------------------------------------------------------------------------------------------------------------------------------------------------------------------------------------------------------------------------------------------------------------------------------------------------------------------------------------------------------------------------------------------------------------------------------------------------------------------------------------------------------------------------------------------------------------------------------------------------------------------------------------------------------------------------------------------------------------------------------------------------------------------------------------------------------------------------------------------------------------------------------------------------------------------------------------------------------------------------------------------------------------------------------------------------------------------------------------------------------------------------------------------------------------------------------------------------------------------------------------------------------------------------------------------------------------------------------------------------------------------------------------------------------------------------------------------------------------------------------------------------------------------------------------------------------------------------------------------------------------------------------------------------------------------------------------------------------------------------------------------------------------------------------------------------------------------------------------------------------------------------------------------------------------------------------------------------------------------------------------------------------------------------------------------------------------------------------------------------------------------------------------------------------------------------------------------------------------------------------------------------------------------------------------------------------------------------------------------------------------------------------------------------------------------------------------------------------------------------------------------------------------------------------------------------------------------------------------------------------------|-----------|
|    | russula or european mole or talpa or chiroptera or bat or bats or eptesicus or serotinus or myotis or dasycneme or daubentonii or pipistrelle or pipistrellus or cat or cats or felis or catus or feline or dog or dogs or canis or canine or canines or otter or otters or lutra or badger or badgers or meles or fitchew or fitch or foumart or foulmart or ferrets or ferret or polecat or polecats or mustela or putorius or weasel or weasels or fox or foxes or vulpes or common seal or phoca or vitulina or grey seal or halichoerus or horse or horses or equus or equine or equidae or donkey or donkeys or mule or mules or pig or pigs or swine or swines or hog or hogs or boar or boars or porcine or piglet or piglets or sus or scrofa or llama or llamas or lama or glama or deer or deers or cervus or elaphus or cow or cows or bos taurus or bos indicus or bovine or bull or bulls or cattle or bison or bisons or sheep or sheeps or ovis aries or ovine or lamb or lambs or mouflon or mouflons or goat or goats or capra or caprine or chamois or rupicapra or leporidae or lagomorpha or lagomorph or rabbit or rabbits or oryctolagus or cuniculus or laprine or hares or lepus or rodentia or rodent or rodents or murinae or mouse or mice or mus or musculus or murine or woodmouse or apodemus or rat or rats or rattus or norvegicus or guinea pig or guinea pigs or cavia or porcellus or hamster or hamsters or mesocricetus or cricetus or gerbil or gerbils or jird or jirds or meriones or unguiculatus or jerboa or jerboas or jaculus or chinchilla or chinchillas or beaver or beavers or castor fiber or castor canadensis or sciuridae or squirrel or squirrels or sciurus or chipmunk or chipmunks or marmot or marmots or marmota or suslik or susliks or spermophilus or cynomys or cottonrat or cottonrats or sigmodon or vole or voles or microtus or myodes or glareolus or primate or primates or prosimian or prosimians or lemur or lemurs or lemuridae or loris or bush baby or bush babies or bushbaby or bushbabies or galago or galagos or anthropoidea or anthropoids or simian or simians or monkey or monkeys or marmoset or marmosets or callithrix or cebuella or tamarin or tamarins or saguinus or leontopithecus or squirrel monkey or squirrel monkeys or saimiri or night monkey or night monkeys or owl monkey or owl monkeys or douroucoulis or aotus or spider monkey or spider monkeys or ateles or baboon or baboons or papio or rhesus monkey or macaque or macaca or mulatta or cynomolgus or fascicularis or green monkey or green monkeys or chlorocebus or vervet or vervets or pygerythrus or hominoidea or ape or apes or hylobatidae or gibbon or gibbons or siamang or siamangs or nomascus or symphalangus or hominidae or orangutan or orangutans or pongo or chimpanzee or chimpanzees or pan troglodytes or bonobo or bonobos or pan paniscus or gorilla or gorillas or troglodytes).ti,ab. |           |
| 9  | 1 or 2 or 3 or 4 or 5                                                                                                                                                                                                                                                                                                                                                                                                                                                                                                                                                                                                                                                                                                                                                                                                                                                                                                                                                                                                                                                                                                                                                                                                                                                                                                                                                                                                                                                                                                                                                                                                                                                                                                                                                                                                                                                                                                                                                                                                                                                                                                                                                                                                                                                                                                                                                                                                                                                                                                                                                                                                                                                                                                                                                                                                                                                                                                                                                         | 119,886   |
| 10 | 6 or 7                                                                                                                                                                                                                                                                                                                                                                                                                                                                                                                                                                                                                                                                                                                                                                                                                                                                                                                                                                                                                                                                                                                                                                                                                                                                                                                                                                                                                                                                                                                                                                                                                                                                                                                                                                                                                                                                                                                                                                                                                                                                                                                                                                                                                                                                                                                                                                                                                                                                                                                                                                                                                                                                                                                                                                                                                                                                                                                                                                        | 3,639,020 |
| 11 | 8 and 9 and 10                                                                                                                                                                                                                                                                                                                                                                                                                                                                                                                                                                                                                                                                                                                                                                                                                                                                                                                                                                                                                                                                                                                                                                                                                                                                                                                                                                                                                                                                                                                                                                                                                                                                                                                                                                                                                                                                                                                                                                                                                                                                                                                                                                                                                                                                                                                                                                                                                                                                                                                                                                                                                                                                                                                                                                                                                                                                                                                                                                | 1,220     |

| # | Search                                                                                                                                                                                                                                                                                                                                                                                                                                                                                                                                                                                                                                                                                                                                                                                                                                                                                                                                                                                                                                                                                                                                                                                                                                                                                                                                                                                                                                                                                                                                                                                                                                                                                                                                                                                                                                                               | Results |
|---|----------------------------------------------------------------------------------------------------------------------------------------------------------------------------------------------------------------------------------------------------------------------------------------------------------------------------------------------------------------------------------------------------------------------------------------------------------------------------------------------------------------------------------------------------------------------------------------------------------------------------------------------------------------------------------------------------------------------------------------------------------------------------------------------------------------------------------------------------------------------------------------------------------------------------------------------------------------------------------------------------------------------------------------------------------------------------------------------------------------------------------------------------------------------------------------------------------------------------------------------------------------------------------------------------------------------------------------------------------------------------------------------------------------------------------------------------------------------------------------------------------------------------------------------------------------------------------------------------------------------------------------------------------------------------------------------------------------------------------------------------------------------------------------------------------------------------------------------------------------------|---------|
| 1 | TS=(Fermented Foods OR Fermented Beverages OR Fermentation OR Fermentation, plant OR Fermented, plant OR Fermentations, plant OR Fermented Foods, plant OR Fermented Beverages, plant OR microorganism fermentation extract, plant OR Fermented Food, plant OR Food, Fermented, plant OR Foods, Fermented, plant OR Cultured Foods, plant OR Cultured Food, plant OR Foods, Cultured, plant OR Beverage, Fermented, plant OR Beverages, Fermented, plant OR Fermented Beverage, plant OR Microbiota, plant OR Microbiome, plant OR Probiotic*, plant OR Probiotics, plant OR Postbiotic*, plant OR Postbiotics, plant OR Paraprobiotic*, plant OR Paraprobiotics, plant OR Synbiotic*, plant OR Synbiotics, plant)                                                                                                                                                                                                                                                                                                                                                                                                                                                                                                                                                                                                                                                                                                                                                                                                                                                                                                                                                                                                                                                                                                                                                   | 201,687 |
| 2 | TS=(Apple vinegar OR Avena sativa OR Baxhin OR Bexhin OR Fruit pickle OR Gherkins OR Gruel OR Kali OR Kiisel OR Kile OR Kimchi OR Kisiel OR Kisla OR Kisla vara OR Kvass OR Lacto-fermented cucumbers OR Lacto-fermented gruel OR Lacto-fermented hogweed soup OR Miso OR Oat kile OR Pickle OR Rice vinegar OR Sarma OR Sauerkraut OR Soup OR Sour drink OR Sour beverage OR Soy sauce OR Taar OR Traditional fermented food OR Traditional fermented beverage OR Turshiena chorba OR Vinegar OR Ang-kak OR Boza OR Busa OR Ben-saalga OR Dosa OR Enjera OR Injera OR Gowe OR Husuwa OR Idli OR Jalebi OR Kenkey OR Khamak OR Kao-mak OR Kunu-zaki OR Kisra OR Koko OR Lao-chao OR Mawe OR Mbege OR Ogi OR Pito OR Poto poto OR Pozol OR Puto OR Rabadi OR Selroti OR Sourdough OR Tape Ketan OR Togwa OR Tarhana OR Uji OR Burong mustala OR Fermented cupers OR Fermented cucumbers OR Dha muoi OR Ekung OR Eup OR Fu-tsai OR Goyang OR Gundruk OR Herring OR Hom-dong OR Jiang-gua OR Jiang-sun OR Khalpi OR Naw-mai-dong OR Mesu OR Oiji OR Fermented olives OR Pak-gard-dong OR Pak-sian-dong OR Paocai OR Sayur asin OR Soibum OR Soidon OR Sinki OR Suan-cai OR Suan-tsai OR Sunki OR Takuanzuke OR Tuaithur OR Bekang OR Bhallae OR Bikalga OR Chungkokjang OR Jeonkukjang OR Cheonggukjang OR Dawadawa OR Dhokla OR Douchi OR Doenjang OR Furu OR Gochujang OR Hawaijar OR Iru OR Kanjang OR Kawal OR Kecap OR Ketjap OR Kinda OR Kinema OR Maseura OR Meitauza OR Meju OR Natto OR Oncom Hitam OR "Black Oncom" OR "Oncom Merah" OR "Orange Oncom" OR Ogiri OR Ogili OR Okpehe OR Soumbala OR Shoyu OR Sufu OR Tauco OR Tempe OR Thua nao OR Tungrymbai OR Ugba OR Wari OR Yandou OR Chikwangue OR Cingwada OR Fufu OR Gari OR Lafun OR Konkonte OR Tape OR Tapai Ubi OR Bushera, Obushera OR Ikii OR Koozh OR Mahewu OR Swazi OR Ting OR Garri OR Siljo) | 120,312 |
| 3 | TS=(Bacillus OR Bacillus amyloliquefaciens OR Bacillus subtilis OR Bifidobacterium OR Enterococcus faecalis OR Enterococcus faecium OR LAB OR                                                                                                                                                                                                                                                                                                                                                                                                                                                                                                                                                                                                                                                                                                                                                                                                                                                                                                                                                                                                                                                                                                                                                                                                                                                                                                                                                                                                                                                                                                                                                                                                                                                                                                                        | 104,935 |



Lactiplantibacillus plantarum OR Lactic acid bacteria OR Lactobacillus OR Lactococcus OR Latilactobacillus sakei OR Leuconostoc OR Levilactobacillus brevis OR Limosilactobacillus Fermentum OR Fungus OR Mold OR Aspergillus OR Oenococcus OR Pediococcus OR Red mold-fermented OR Streptococcus OR Rhizopus OR Saccharomyces OR Streptococcus thermophilus OR Weissella OR Monascus OR Mucor OR Lactobacillus bulgaricus OR Weissella confusa OR Lactobacillus amylolyticus OR Lactobacillus helveticus OR Lactobacillus acidophilus OR Lactobacillus coprophilus OR Lactococcus raffinolactis OR Leuconostoc mesenteroides OR Lacticaseibacillus paracasei OR Lactobacillus delbrueckii OR Weissella confusa OR Lacticaseibacillus rhamnosus OR Pediococcus sp. OR Leuconostoc sp. OR Weissella sp. OR Streptococcus lutetiensis OR Clostridium perfringens OR Pediococcus pentosaceus OR Lactiplantibacillus paraplantarum OR Pediococcus acidilacti OR Lactococcus lactis OR Lactobacillus gasseri OR Enterococcus sp. OR Escherichia coli OR Bacillus sp. OR Limosilactobacillus reuteri OR Bifidobacterium sp. OR Leuconostoc pseudomesenteroides OR Weissella cibaria OR Lactobacillus casei OR Lactobacillus bulgaricus OR Leuconostoc citreum OR Lactobacillus harbinensis OR Lactobacillus coryniformis OR Lentilactobacillus parabuchneri OR Streptococcus faecalis OR Pediococcus cerevisiae OR Lactobacillus delbrueckii OR Micrococcus sp. OR Lactobacillus pentosus OR Leu. mesenteroides OR Streptococcus thermophilus OR Bacillus lactis OR Bacillus longum OR Bacillus infantis OR Lacticaseibacillus mesenteroides OR Lacticaseibacillus cremoris OR Lacticaseibacillus lactis OR Bifidobacterium lactis OR Clostridium OR Butyrivibrio OR Escherichia OR Enterobacter OR Salmonella OR Klebsiella OR Shigella OR Propionibacter OR Veilonella OR Bacteroides OR Clostridia OR Acetobacter OR Gluconobacter OR Gluconacetobacter OR Halomonas OR Hafnia OR Tatumella OR Zymomonas OR Brachybacter OR Microbacter OR Brevibacter OR Corynebacter OR Micrococcus OR Kocuria OR Arthrobacter OR Propionibacter OR Streptomyces OR Bifidobacter OR Gemella OR Jeotgalicoccus OR Carnobacter OR Enterococcus OR Tetragenococcus OR Vagococcus OR Weissella OR Staphylococcus OR Actinomucor OR Amylomyces OR Bjerkandera OR Brettanomyces OR Candida OR Cryptococcus OR Cyberlindnera OR Cystofilobasidium OR Debaryomyces OR Dekkera OR Fusarium OR Galactomyces OR Geotrichum OR Cladosporium OR Guehomyces OR Hanseniaspora OR Hansenula OR Hyphopichia OR Issatchenkia OR Kazachstania OR Kluyveromyces OR Lecanicillium OR Lachancea OR Metschnikowia OR Neurospora OR Penicillium OR Pichia OR Rhodotorula OR Rhodosporidium OR Saccharomycodes OR Saccharomycopsis OR Schizosaccharomyces OR Schwanniomyces OR Sporobolomyces OR Scopulariopsis OR Sporendonema OR Starmerella OR Torulaspora OR Trametes OR Trichosporon OR Trigonopsis OR Torulopsis OR Ustilago OR Wickerhamomyces OR Yarrowia OR Zygosaccharomyces OR Zygotorulaspora) AND TS=(fermented OR fermentation OR ferment OR fermenting)

|   |                                                                                                                                                                                                                                                                                                                                                                                                                                                                                                                                                                                                                                                                                                                                                                                                                                                                                                                                                                                                                                                                                                                                                                                                                                                                                                                                                                                                                                                                                                                                                                                                                                                                                                                                                                                                                                                                                                                                                                                                                                                                                                                                                                                                                                                                                                                                                                                                                                                                                                                                                                                                                       |        |
|---|-----------------------------------------------------------------------------------------------------------------------------------------------------------------------------------------------------------------------------------------------------------------------------------------------------------------------------------------------------------------------------------------------------------------------------------------------------------------------------------------------------------------------------------------------------------------------------------------------------------------------------------------------------------------------------------------------------------------------------------------------------------------------------------------------------------------------------------------------------------------------------------------------------------------------------------------------------------------------------------------------------------------------------------------------------------------------------------------------------------------------------------------------------------------------------------------------------------------------------------------------------------------------------------------------------------------------------------------------------------------------------------------------------------------------------------------------------------------------------------------------------------------------------------------------------------------------------------------------------------------------------------------------------------------------------------------------------------------------------------------------------------------------------------------------------------------------------------------------------------------------------------------------------------------------------------------------------------------------------------------------------------------------------------------------------------------------------------------------------------------------------------------------------------------------------------------------------------------------------------------------------------------------------------------------------------------------------------------------------------------------------------------------------------------------------------------------------------------------------------------------------------------------------------------------------------------------------------------------------------------------|--------|
| 4 | <p>TS=(Apples OR Blackberries OR Cabbage OR Cucumber OR Gentian roots OR Juniper berries OR Lingonberries OR Medlars OR Oat OR Pears OR Plums OR Radish OR Raspberries OR Rye OR Sloe OR Spicy red pepper OR Wild apples OR Sorghum OR Maize OR Rice OR Millet OR cassava OR Pearl millet OR Wheat OR green gram OR Tef OR Barley OR finger millet mal OR Soybean OR Black lentils OR Black gram OR opium seeds OR walnut OR Phaselus mango OR Lentil OR Bambara groundnut OR locust bean OR Chickpeas OR red pepper OR Cassia sp. OR Black soybean OR Bengal gram OR Red gram OR Castor oil seed OR melon seed OR groundnut OR fluted pumpkin seed OR African oil bean OR Hordeum vulgare OR Pea OR Linseed OR Pisum sativum OR Linum usitatissimum OR Cowpea OR Avena sativa OR Pennisetum glaucum OR Oryza sativa OR Sorghum bicolor OR Eragrostis tef OR Pentaclethra macrophylla OR African yam bean OR Sphenostylis stenocarpa OR Vigna subterranea OR Phaseolus vulgaris OR Vigna unguiculata OR Black-eyed pea OR Cicer arietinum L. OR Common bean OR Vigna sinensis L. var. carilla OR Guanacaste OR Enterolobium cyclocarpum OR Horse gram OR Macrotyloma uniflorum OR Kidney bean OR Lens culinaris OR Lima bean OR Phaseolus lunatus OR Lupin OR Lupinus albus OR Lupinus luteus OR Lupinus angustifolius L. OR Lyon bean OR Mucuna cochinchinensis OR Mahogany Bean OR Afzelia africana OR Mung bean OR Vigna radiata OR Pigeon pea OR Cajanus cajan OR Red bean OR Phaseolus angularis OR Glycine max OR Tamarind OR Tamarindus indica L. OR Vigna racemosa OR Mulberry OR Morus nigra OR Pomegranate OR Punica granatum L. OR Cashew apple OR Anacardium occidentale L. OR Cantaloupe melon OR Cucumis melo L. OR Apple OR Noni OR Morinda citrifolia OR Pear OR Pyrus communis OR Cherry OR Litchi OR Litchi chinensis Sonn. OR Orange OR Papaya OR Carica papaya L. OR Grape OR Cranberry OR Prickly pear OR Phyllanthus emblica OR Jujube OR Ziziphus jujuba Mill. OR Feijoa OR Feijoa sellowiana OR Tomato OR Lycopersicon esculentum OR Cactus pear OR Opuntia ficus-indica OR Carrot OR Potato OR Solanum tuberosum L. OR Beetroot OR Beta vulgaris L. OR Lycopersicum esculentum OR haw OR Mustard OR Cupers OR Cucumbers OR beet OR eggplant OR Bamboo shoot OR Red onion OR green onion OR hot pepper OR ginger OR Olive OR "Gynandropis pentaphylla" OR Turnip OR Roselle OR Peanut OR tapioca OR Melon Seeds OR "castor oil seeds" OR pumpkin bean OR sesame OR "Prosopis africana" OR "Pentaclethra macrophylla" OR Ragi) AND TS=(fermented OR fermentation OR ferment OR fermenting)</p> | 51,940 |
| 5 | <p>TS=(Acer platanoides OR Aegopodium podagraria OR Alcea rosea OR Allium OR Allium cepa OR Allium sativum OR Allium schoenoprasum OR Anethum graveolens OR Apium graveolens OR Arctium lappa OR Armoracia rusticana OR Artemisia absinthium OR Atriplex OR Avena sativa OR Berberis vulgaris OR Beta vulgaris OR Betula pendula OR Betula pubescens OR Brassica cretica OR Brassica nigra OR Brassica oleracea OR Brassica</p>                                                                                                                                                                                                                                                                                                                                                                                                                                                                                                                                                                                                                                                                                                                                                                                                                                                                                                                                                                                                                                                                                                                                                                                                                                                                                                                                                                                                                                                                                                                                                                                                                                                                                                                                                                                                                                                                                                                                                                                                                                                                                                                                                                                       | 4,342  |

|   |                                                                                                                                                                                                                                                                                                                                                                                                                                                                                                                                                                                                                                                                                                                                                                                                                                                                                                                                                                                                                                                                                                                                                                                                                                                                                                                                                                                                                                                                                                                                                                                                                                                                                                                                                                                                                                                                                                                                                                                                       |           |
|---|-------------------------------------------------------------------------------------------------------------------------------------------------------------------------------------------------------------------------------------------------------------------------------------------------------------------------------------------------------------------------------------------------------------------------------------------------------------------------------------------------------------------------------------------------------------------------------------------------------------------------------------------------------------------------------------------------------------------------------------------------------------------------------------------------------------------------------------------------------------------------------------------------------------------------------------------------------------------------------------------------------------------------------------------------------------------------------------------------------------------------------------------------------------------------------------------------------------------------------------------------------------------------------------------------------------------------------------------------------------------------------------------------------------------------------------------------------------------------------------------------------------------------------------------------------------------------------------------------------------------------------------------------------------------------------------------------------------------------------------------------------------------------------------------------------------------------------------------------------------------------------------------------------------------------------------------------------------------------------------------------------|-----------|
|   | <p>rapa OR Bromus secalinus OR Capsicum annuum OR Carum carvi OR Cicer arietinum OR Citrullus lanatus OR Citrus limon OR Citrus sinensis OR Cornelian cherries OR Cornus mas OR Crataegus OR Cucumis melo OR Cucumis sativus OR Cucurbita pepo OR Cyanus segetum hill OR Cydonia oblonga OR Daucus carota OR Empetrum nigrum OR Fagopyrum esculentum moench OR Fagus sylvatica OR Fragaria vesca OR Gentiana lutea OR Helianthus tuberosus OR Heracleum sphondylium OR Hordeum distichon OR Hordeum vulgare OR Humulus lupulus OR Juniperus communis OR Laurus nobilis OR Ledum palustre OR Linum usitatissimum OR Maianthemum bifolium OR Malus domestica OR Melittis melissophyllum OR Mentha OR Menyanthes trifoliata OR Mespilus germanica OR Morus alba OR Morus nigra OR Myrica gale OR Malus OR Malus sylvestris OR Panicum miliaceum OR Persicaria bistorta OR Phaseolus vulgaris OR Pimenta dioica OR Piper nigrum OR Pisum sativum OR Polypodium vulgare OR Prunus fruticans weihe OR Prunus armeniaca OR Prunus avium OR Prunus cerasifera OR Prunus cerasus OR Prunus domestica OR Prunus padus OR Prunus spinosa OR Primula veris OR Pteridium aquilinum OR Pyrus communis OR Pyrus elaeagnifolia OR Pyrus pyraster OR Quercus robur OR Ribes alpinum OR Ribes nigrum OR Ribes rubrum OR Ribes spicatum robson OR Ribes uva-crispa OR Rubus caesius OR Rubus fruticosus OR Rubus idaeus OR Rubus saxatilis OR Rubus subgenus rubus OR Robinia pseudoacacia OR Rosa canina OR Rosa OR Sambucus ebulus OR Sambucus nigra OR Secale cereale OR Solanum lycopersicum OR Solanum tuberosum OR Sorbus aucuparia OR Sorbus domestica OR Sorbus intermedia OR Sorbus rupicola OR Sorbus torminalis OR Tanacetum vulgare OR Taraxacum OR Tilia tomentosa moench OR Triticum OR Vaccinium myrtillus OR Vaccinium oxycoccos OR Vaccinium uliginosum OR Vaccinium vitis-idaea OR Viburnum opulus OR Vicia faba OR Vitis OR Zea mays) AND TS=(fermented OR fermentation OR ferment OR fermenting)</p> |           |
| 6 | <p>TS=(Alzheimer Dementia OR Alzheimer Dementias OR Dementia, Alzheimer OR Alzheimer's Disease OR Dementia, Senile OR Senile Dementia OR Dementia, Alzheimer Type OR Alzheimer Type Dementia OR Alzheimer-Type Dementia OR Alzheimer Type Dementia OR Dementia, Alzheimer-Type OR Alzheimer Type Senile Dementia OR Primary Senile Degenerative Dementia OR Dementia, Primary Senile Degenerative OR Alzheimer Sclerosis OR Sclerosis, Alzheimer OR Alzheimer Syndrome OR Alzheimer's Diseases OR Alzheimer Diseases OR Alzheimers Diseases OR Senile Dementia, Alzheimer Type OR Acute Confusional Senile Dementia OR Senile Dementia, Acute Confusional OR Dementia, Presenile OR Presenile Dementia OR Alzheimer Disease, Late Onset OR Late Onset Alzheimer Disease OR Alzheimer's Disease, Focal Onset OR Focal Onset Alzheimer's Disease OR Familial Alzheimer Disease OR Alzheimer Disease, Familial OR Familial Alzheimer Diseases OR Alzheimer Disease, Early Onset OR Early Onset Alzheimer</p>                                                                                                                                                                                                                                                                                                                                                                                                                                                                                                                                                                                                                                                                                                                                                                                                                                                                                                                                                                                             | 3,077,388 |

|   |                                                                                                                                                                                                                                                                                                                                                                                                                                                                                                                                                                                                                                                                                                                                                                                                                                                                                                                                                                                                                                                                                                                                                                                                                                                                                                                                                                                                                                                                                                                                                                                                                                                                                                                                                                                                                                                               |           |
|---|---------------------------------------------------------------------------------------------------------------------------------------------------------------------------------------------------------------------------------------------------------------------------------------------------------------------------------------------------------------------------------------------------------------------------------------------------------------------------------------------------------------------------------------------------------------------------------------------------------------------------------------------------------------------------------------------------------------------------------------------------------------------------------------------------------------------------------------------------------------------------------------------------------------------------------------------------------------------------------------------------------------------------------------------------------------------------------------------------------------------------------------------------------------------------------------------------------------------------------------------------------------------------------------------------------------------------------------------------------------------------------------------------------------------------------------------------------------------------------------------------------------------------------------------------------------------------------------------------------------------------------------------------------------------------------------------------------------------------------------------------------------------------------------------------------------------------------------------------------------|-----------|
|   | <p>Disease OR Presenile Alzheimer Dementia OR Cognitive damage OR Cognitive decline OR Cognitive declines OR Cognitive disorders OR Cognitive dysfunction OR Cognitive dysfunctions OR Cognitive failure OR Cognitive frailty OR Cognitive function OR Cognitive functions OR Cognitive function scanner OR Cognitive impairment OR Cognitive impairments OR Cognitive impairment, mild OR Cognitive impairments, mild OR Cognition performance OR Cognitive retention disorders OR Decline, cognitive OR Declines, cognitive OR Deficit, memory OR Deficits, memory OR Dysfunction, cognitive OR Dysfunctions, cognitive OR Impairment, cognitive OR Impairments, cognitive OR Impairment, mild cognitive OR Impairments, mild cognitive OR Learning OR Learning ability OR Memory OR Memory decline OR Memory defects OR Memory deficit OR Memory deficits OR Memory disorder OR Memory disorders, age related OR Memory disorders, age-related OR Memory disorder, semantic OR Memory disorder, spatial OR Memory disorders, spatial OR Memory for designs test OR Memory impairment OR Memory loss OR Memory losses OR Familial dementia OR Familial dementias)</p>                                                                                                                                                                                                                                                                                                                                                                                                                                                                                                                                                                                                                                                                                       |           |
| 7 | <p>TS=(animal experimentation OR models, animal OR invertebrates OR Animals OR animal population groups OR chordata OR chordata, nonvertebrate OR vertebrates OR amphibians OR birds OR fishes OR reptiles OR mammals OR primates OR artiodactyla OR carnivora OR cetacea OR chiroptera OR elephants OR hyraxes OR insectivora OR lagomorpha OR marsupialia OR monotremata OR perissodactyla OR rodentia OR scandentia OR sirenia OR xenarthra OR haplorhini OR strepsirhini OR platyrrhini OR tarsii OR catarrhini OR cercopithecidae OR hylobatidae OR hominidae OR gorilla gorilla OR pan paniscus OR pan troglodytes OR pongo pygmaeus OR animals OR animal OR mice OR mus OR mouse OR murine OR woodmouse OR rats OR rat OR murinae OR muridae OR cottonrat OR cottonrats OR hamster OR hamsters OR cricetinae OR rodentia OR rodent OR rodents OR pigs OR pig OR swine OR swines OR piglets OR piglet OR boar OR boars OR sus scrofa OR ferrets OR ferret OR polecat OR polecats OR mustela putorius OR guinea pigs OR guinea pig OR cavia OR callithrix OR marmoset OR marmosets OR cebuella OR hapale OR octodon OR chinchilla OR chinchillas OR gerbillinae OR gerbil OR gerbils OR jird OR jirds OR merione OR meriones OR rabbits OR rabbit OR hares OR hare OR diptera OR flies OR fly OR dipteran OR drosophila OR drosophilidae OR cats OR cat OR carus OR felis OR nematoda OR nematode OR nematodes OR sipunculida OR dogs OR dog OR canine OR canines OR canis OR sheep OR sheeps OR mouflon OR mouflons OR ovis OR goats OR goat OR capra OR capras OR rupicapra OR rupicapras OR chamois OR haplorhini OR monkey OR monkeys OR anthropoidea OR anthropoids OR saguinus OR tamarin OR tamarins OR leontopithecus OR hominidae OR ape OR apes OR pan paniscus OR bonobo OR bonobos OR pan troglodytes OR gibbon OR gibbons OR siamang OR</p> | 8,915,414 |

|   |                                                                                                                                                                                                                                                                                                                                                                                                                                                                                                                                                                                                                                                                                                                                                                                                                                                                                                                                                                                                                                                                                                                                                                                                                                                                                                                                                                                                                                                                                                                                                                                                                                                                                                                                                                                                                                                                                                                                                                                                                                                                                                                                                                                                                                                                                                                                                                                                                                                                                                     |         |
|---|-----------------------------------------------------------------------------------------------------------------------------------------------------------------------------------------------------------------------------------------------------------------------------------------------------------------------------------------------------------------------------------------------------------------------------------------------------------------------------------------------------------------------------------------------------------------------------------------------------------------------------------------------------------------------------------------------------------------------------------------------------------------------------------------------------------------------------------------------------------------------------------------------------------------------------------------------------------------------------------------------------------------------------------------------------------------------------------------------------------------------------------------------------------------------------------------------------------------------------------------------------------------------------------------------------------------------------------------------------------------------------------------------------------------------------------------------------------------------------------------------------------------------------------------------------------------------------------------------------------------------------------------------------------------------------------------------------------------------------------------------------------------------------------------------------------------------------------------------------------------------------------------------------------------------------------------------------------------------------------------------------------------------------------------------------------------------------------------------------------------------------------------------------------------------------------------------------------------------------------------------------------------------------------------------------------------------------------------------------------------------------------------------------------------------------------------------------------------------------------------------------|---------|
|   | <p>siamangs OR nomascus OR symphalangus OR chimpanzee OR chimpanzees OR prosimian OR prosimians OR bush baby OR bush babies OR galagos OR galago OR pongidae OR gorilla OR gorillas OR pongo pygmaeus OR orangutan OR orangutans OR lemur OR lemurs OR lemuridae OR horse OR horses OR equus OR cow OR calf OR bull OR chicken OR chickens OR gallus OR quail OR bird OR birds OR quails OR poultry OR poultries OR fowl OR fowls OR reptile OR reptilia OR reptiles OR snakes OR snake OR lizard OR lizards OR alligator OR alligators OR crocodile OR crocodiles OR turtle OR turtles OR amphibian OR amphibians OR amphibia OR frog OR frogs OR bombina OR salientia OR toad OR toads OR epidalea calamita OR salamander OR salamanders OR eel OR eels OR fish OR fishes OR pisces OR catfish OR catfishes OR siluriformes OR arius OR heteropneustes OR sheatfish OR perch OR perches OR percidae OR perca OR trout OR trouts OR char OR chars OR salvelinus OR minnow OR cyprinidae OR carps OR carp OR zebrafish OR zebrafishes OR goldfish OR goldfishes OR guppy OR guppies OR chub OR chubs OR tinca OR barbels OR barbus OR pimephales OR promelas OR poecilia reticulata OR mullet OR mullets OR eel OR eels OR seahorse OR seahorses OR mugil curema OR atlantic cod OR shark OR sharks OR catshark OR anguilla OR salmonid OR salmonids OR whitefish OR whitefishes OR salmon OR salmons OR sole OR solea OR lamprey OR lampreys OR pumpkinseed OR sunfish OR sunfishes OR tilapia OR tilapias OR turbot OR turbots OR flatfish OR flatfishes OR sciuridae OR squirrel OR squirrels OR chipmunk OR chipmunks OR suslik OR susliks OR vole OR voles OR lemming OR lemmings OR muskrat OR muskrats OR lemmus OR otter OR otters OR marten OR martens OR martes OR weasel OR badger OR badgers OR ermine OR mink OR minks OR sable OR sables OR gulo OR gulos OR wolverine OR wolverines OR mustela OR llama OR llamas OR alpaca OR alpacas OR camelid OR camelids OR guanaco OR guanacos OR chiroptera OR chiropteras OR bat OR bats OR fox OR foxes OR iguana OR iguanas OR xenopus laevis OR parakeet OR parakeets OR parrot OR parrots OR donkey OR donkeys OR mule OR mules OR zebra OR zebras OR shrew OR shrews OR bison OR bisons OR buffalo OR buffaloes OR deer OR deers OR bear OR bears OR panda OR pandas OR wild hog OR wild boar OR fitchew OR fitch OR beaver OR beavers OR jerboa OR jerboas OR capybara OR capybaras OR canine OR bovine OR porcine OR hog OR hogs)</p> |         |
| 8 | #1 OR #2 OR #3 OR #4 OR #5                                                                                                                                                                                                                                                                                                                                                                                                                                                                                                                                                                                                                                                                                                                                                                                                                                                                                                                                                                                                                                                                                                                                                                                                                                                                                                                                                                                                                                                                                                                                                                                                                                                                                                                                                                                                                                                                                                                                                                                                                                                                                                                                                                                                                                                                                                                                                                                                                                                                          | 320,284 |
| 9 | #6 AND #7 AND #8                                                                                                                                                                                                                                                                                                                                                                                                                                                                                                                                                                                                                                                                                                                                                                                                                                                                                                                                                                                                                                                                                                                                                                                                                                                                                                                                                                                                                                                                                                                                                                                                                                                                                                                                                                                                                                                                                                                                                                                                                                                                                                                                                                                                                                                                                                                                                                                                                                                                                    | 819     |

| # | Search                                                                                                                                                                                                                                                                                                                                                                                                                                                                                                                                                                                                                                                                                                                                                                                                                                                                                                                                                                                                                                                                                                                                                                                                                                                                                                                                                                                                                                                                                                                                                                                                                                                                                                                                                                                                                                                                                                                                                                                                                                                                                                                                                                                    | Results |
|---|-------------------------------------------------------------------------------------------------------------------------------------------------------------------------------------------------------------------------------------------------------------------------------------------------------------------------------------------------------------------------------------------------------------------------------------------------------------------------------------------------------------------------------------------------------------------------------------------------------------------------------------------------------------------------------------------------------------------------------------------------------------------------------------------------------------------------------------------------------------------------------------------------------------------------------------------------------------------------------------------------------------------------------------------------------------------------------------------------------------------------------------------------------------------------------------------------------------------------------------------------------------------------------------------------------------------------------------------------------------------------------------------------------------------------------------------------------------------------------------------------------------------------------------------------------------------------------------------------------------------------------------------------------------------------------------------------------------------------------------------------------------------------------------------------------------------------------------------------------------------------------------------------------------------------------------------------------------------------------------------------------------------------------------------------------------------------------------------------------------------------------------------------------------------------------------------|---------|
| 1 | TITLE-ABS-KEY ("Fermented Foods" OR "Fermented Beverages" OR "Fermentation" OR "Fermentation W/15 plant" OR "Fermented W/15 plant" OR "Fermentations W/15 plant" OR "microorganism W/15 plant" OR "Cultured W/15 plant" OR "Microbiota W/15 plant" OR "Microbiome W/15 plant" OR "Probiotic* W/15 plant" OR "Probiotics W/15 plant" OR "Postbiotic* W/15 plant" OR "Postbiotics W/15 plant" OR "Paraprobiotic* W/15 plant" OR "Paraprobiotics W/15 plant" OR "Synbiotic* W/15 plant" OR "Synbiotics W/15 plant")                                                                                                                                                                                                                                                                                                                                                                                                                                                                                                                                                                                                                                                                                                                                                                                                                                                                                                                                                                                                                                                                                                                                                                                                                                                                                                                                                                                                                                                                                                                                                                                                                                                                          | 209,199 |
| 2 | TITLE-ABS-KEY ("Apple vinegar" Or "Avena sativa" Or "Baxhin" Or "Bexhin" Or "Fruit pickle" Or "Gherkins" Or "Gruel" Or "Kali" Or "Kiisel" Or "Kile" Or "Kimchi" Or "Kisiel" Or "Kisla" Or "Kisla vara" Or "Kvass" Or "Lacto-fermented cucumbers" Or "Lacto-fermented gruel" Or "Lacto-fermented hogweed soup" Or "Miso" Or "Oat kile" Or "Pickle" Or "Rice vinegar" Or "Sarma" Or "Sauerkraut" Or "Soup" Or "Sour drink" Or "Sour beverage" Or "Soy sauce" Or "Taar" Or "Traditional fermented food" Or "Traditional fermented beverage" Or "Turshiena chorba" Or "Vinegar" Or "Ang-kak" Or "Boza" Or "Busa" Or "Ben-saalga" Or "Dosa" Or "Enjera" Or "Injera" Or "Gowe" Or "Hussuwa" Or "Idli" Or "Jalebi" Or "Kenkey" Or "Khamak" Or "Kao-mak" Or "Kunu-zaki" Or "Kisra" Or "Koko" Or "Lao-chao" Or "Mawe" Or "Mbege" Or "Ogi" Or "Pito" Or "Poto poto" Or "Pozol" Or "Puto" Or "Rabadi" Or "Selroti" Or "Sourdough" Or "Tape Ketan" Or "Togwa" Or "Tarhana" Or "Uji" Or "Burong mustala" Or "Fermented cupers" Or "Fermented cucumbers" Or "Dha muoi" Or "Ekung" Or "Eup" Or "Fu-tsai" Or "Goyang" Or "Gundruk" Or "Hirring" Or "Hom-dong" Or "Jiang-gua" Or "Jiang-sun" Or "Khalpi" Or "Naw-mai-dong" Or "Mesu" Or "Oiji" Or "Fermented olives" Or "Pak-gard-dong" Or "Pak-sian-dong" Or "Paocai" Or "Sayur asin" Or "Soibum" Or "Soidon" Or "Sinki" Or "Suan-cai" Or "Suan-tsai" Or "Sunki" Or "Takuanzuke" Or "Tuaithur" Or "Bekang" Or "Bhallae" Or "Bikalga" Or "Chungkokjang" Or "Jeonkukjang" Or "Cheonggukjang" Or "Dawadawa" Or "Dhokla" Or "Douchi" Or "Doenjang" Or "Furu" Or "Gochujang" Or "Hawaijar" Or "Iru" Or "Kanjang" Or "Kawal" Or "Kecap" Or "Ketjap" Or "Kinda" Or "Kinema" Or "Maseura" Or "Meitauza" Or "Meju" Or "Natto" Or "Oncom Hitam" Or "Black Oncom" Or "Oncom Merah" Or "Orange Oncom" Or "Ogiri" Or "Ogili" Or "Okpehe" Or "Soumbala" Or "Shoyu" Or "Sufu" Or "Tauco" Or "Tempe" Or "Thua nao" Or "Tungrymbai" Or "Ugba" Or "Wari" Or "Yandou" Or "Chikwangue" Or "Cingwada" Or "Fufu" Or "Gari" Or "Lafun" Or "Konkonte" Or "Tape" Or "Tapai Ubi" Or "Bushera Obushera" Or "Ikii" Or "Koozh" Or "Mahewu" Or "Swazi" Or "Ting" Or "Garri" Or "Siljo") | 155,757 |

|   |                                                                                                                                                                                                                                                                                                                                                                                                                                                                                                                                                                                                                                                                                                                                                                                                                                                                                                                                                                                                                                                                                                                                                                                                                                                                                                                                                                                                                                                                                                                                                                                                                                                                                                                                                                                                                                                                                                                                                                                                                                                                                                                                                                                                                                                                                                                                                                                                                                                                                                                                                                                                                                                                                                                                                                                                                                                                                                                                                                                                                                                                                                                                                                                                                                                                                                                                                                                                  |         |
|---|--------------------------------------------------------------------------------------------------------------------------------------------------------------------------------------------------------------------------------------------------------------------------------------------------------------------------------------------------------------------------------------------------------------------------------------------------------------------------------------------------------------------------------------------------------------------------------------------------------------------------------------------------------------------------------------------------------------------------------------------------------------------------------------------------------------------------------------------------------------------------------------------------------------------------------------------------------------------------------------------------------------------------------------------------------------------------------------------------------------------------------------------------------------------------------------------------------------------------------------------------------------------------------------------------------------------------------------------------------------------------------------------------------------------------------------------------------------------------------------------------------------------------------------------------------------------------------------------------------------------------------------------------------------------------------------------------------------------------------------------------------------------------------------------------------------------------------------------------------------------------------------------------------------------------------------------------------------------------------------------------------------------------------------------------------------------------------------------------------------------------------------------------------------------------------------------------------------------------------------------------------------------------------------------------------------------------------------------------------------------------------------------------------------------------------------------------------------------------------------------------------------------------------------------------------------------------------------------------------------------------------------------------------------------------------------------------------------------------------------------------------------------------------------------------------------------------------------------------------------------------------------------------------------------------------------------------------------------------------------------------------------------------------------------------------------------------------------------------------------------------------------------------------------------------------------------------------------------------------------------------------------------------------------------------------------------------------------------------------------------------------------------------|---------|
| 3 | TITLE-ABS-KEY ("Bacillus" Or "Bacillus amyloliquefaciens" Or "Bacillus subtilis" Or "Bifidobacterium" Or "Enterococcus faecalis" Or "Enterococcus faecium" Or "LAB" Or "Lactiplantibacillus plantarum" Or "Lactic acid bacteria" Or "Lactobacillus" Or "Lactococcus" Or "Latilactobacillus sakei" Or "Leuconostoc" Or "Levilactobacillus brevis" Or "Limosilactobacillus Fermentum" Or "Fungus" Or "Mold" Or "Aspergillus" Or "Oenococcus" Or "Pediococcus" Or "Red mold-fermented" Or "Streptococcus" Or "Rhizopus" Or "Saccharomyces" Or "Streptococcus thermophilus" Or "Weissella" Or "Monascus" Or "Mucor" Or "Lactobacillus bulgaricus" Or "Weissella confusa" Or "Lactobacillus amylolyticus" Or "Lactobacillus helveticus" Or "Lactobacillus acidophilus" Or "Lactobacillus coprophilus" Or "Lactococcus raffinolactis" Or "Leuconostoc mesenteroides" Or "Lacticaseibacillus paracasei" Or "Lactobacillus delbrueckii" Or "Weissella confusa" Or "Lacticaseibacillus rhamnosus" Or "Pediococcus sp." Or "Leuconostoc sp." Or "Weissella sp." Or "Streptococcus lutetiensis" Or "Clostridium perfringens" Or "Pediococcus pentosaceus" Or "Lactiplantibacillus paraplantarum" Or "Pediococcus acidilacti" Or "Lactococcus lactis" Or "Lactobacillus gasserii" Or "Enterococcus sp." Or "Escherichia coli" Or "Bacillus sp." Or "Limosilactobacillus reuteri" Or "Bifidobacterium sp." Or "Leuconostoc pseudomesenteroides" Or "Weissella cibaria" Or "Lactobacillus casei" Or "Lactobacillus bulgaricus" Or "Leuconostoc citreum" Or "Lactobacillus harbinensis" Or "Lactobacillus coryniformis" Or "Lentilactobacillus parabuchneri" Or "Streptococcus faecalis" Or "Pediococcus cerevisiae" Or "Lactobacillus delbrueckii" Or "Micrococcus sp." Or "Lactobacillus pentosus" Or "Leu. mesenteroides" Or "Streptococcus thermophilus" Or "Bacillus lactis" Or "Bacillus longum" Or "Bacillus infantis" Or "Lacticaseibacillus mesenteroides" Or "Lacticaseibacillus cremoris" Or "Lacticaseibacillus lactis" Or "Bifidobacterium lactis" Or "Clostridium" Or "Butyrivibrio" Or "Escherichia" Or "Enterobacter" Or "Salmonella" Or "Klebsiella" Or "Shigella" Or "Propionibacter" Or "Veilonella" Or "Bacteroides" Or "Clostridia" Or "Acetobacter" Or "Gluconobacter" Or "Gluconacetobacter" Or "Halomonas" Or "Hafnia" Or "Tatumella" Or "Zymomonas" Or "Brachybacter" Or "Microbacter" Or "Brevibacter" Or "Corynebacter" Or "Micrococcus" Or "Kocuria" Or "Arthrobacter" Or "Propionibacter" Or "Streptomyces" Or "Bifidobacter" Or "Gemella" Or "Jeotgalicoccus" Or "Carnobacter" Or "Enterococcus" Or "Tetragenococcus" Or "Vagococcus" Or "Weissella" Or "Staphylococcus" Or "Actinomucor" Or "Amylomyces" Or "Bjerkandera" Or "Brettanomyces" Or "Candida" Or "Cryptococcus" Or "Cyberlindnera" Or "Cystofilobasidium" Or "Debaryomyces" Or "Dekkera" Or "Fusarium" Or "Galactomyces" Or "Geotrichum" Or "Cladosporium" Or "Guehomyces" Or "Hanseniaspora" Or "Hansenula" Or "Hyphopichia" Or "Issatchenkia" Or "Kazachstania" Or "Kluyveromyces" Or "Lecanicillium" Or "Lachancea" Or "Metschnikowia" Or "Neurospora" Or "Penicillium" Or "Pichia" Or "Rhodotorula" Or "Rhodosporidium" Or "Saccharomycodes" Or "Saccharomycopsis" Or "Schizosaccharomyces" Or "Schwanniomycetes" Or "Sporobolomyces" Or "Scopulariopsis" Or "Sporendonema" Or "Starmerella" Or "Torulaspora" Or | 119,967 |
|---|--------------------------------------------------------------------------------------------------------------------------------------------------------------------------------------------------------------------------------------------------------------------------------------------------------------------------------------------------------------------------------------------------------------------------------------------------------------------------------------------------------------------------------------------------------------------------------------------------------------------------------------------------------------------------------------------------------------------------------------------------------------------------------------------------------------------------------------------------------------------------------------------------------------------------------------------------------------------------------------------------------------------------------------------------------------------------------------------------------------------------------------------------------------------------------------------------------------------------------------------------------------------------------------------------------------------------------------------------------------------------------------------------------------------------------------------------------------------------------------------------------------------------------------------------------------------------------------------------------------------------------------------------------------------------------------------------------------------------------------------------------------------------------------------------------------------------------------------------------------------------------------------------------------------------------------------------------------------------------------------------------------------------------------------------------------------------------------------------------------------------------------------------------------------------------------------------------------------------------------------------------------------------------------------------------------------------------------------------------------------------------------------------------------------------------------------------------------------------------------------------------------------------------------------------------------------------------------------------------------------------------------------------------------------------------------------------------------------------------------------------------------------------------------------------------------------------------------------------------------------------------------------------------------------------------------------------------------------------------------------------------------------------------------------------------------------------------------------------------------------------------------------------------------------------------------------------------------------------------------------------------------------------------------------------------------------------------------------------------------------------------------------------|---------|





|   |                                                                                                                                                                                                                                                                                                                                                                                                                                                                                                                                                                                                                                                                                                                                                                                                                                                                                                                                                                                                                                                                                                                                                                                                                                                                                                                                                                                                                                                                                                                                                                                                                                                                                                                                                                                                                                                                                                                                                                                                                                                                                                                                                                                                                                                                                                                                                                                                                                                                                                                                                                                                                                                                                                       |           |
|---|-------------------------------------------------------------------------------------------------------------------------------------------------------------------------------------------------------------------------------------------------------------------------------------------------------------------------------------------------------------------------------------------------------------------------------------------------------------------------------------------------------------------------------------------------------------------------------------------------------------------------------------------------------------------------------------------------------------------------------------------------------------------------------------------------------------------------------------------------------------------------------------------------------------------------------------------------------------------------------------------------------------------------------------------------------------------------------------------------------------------------------------------------------------------------------------------------------------------------------------------------------------------------------------------------------------------------------------------------------------------------------------------------------------------------------------------------------------------------------------------------------------------------------------------------------------------------------------------------------------------------------------------------------------------------------------------------------------------------------------------------------------------------------------------------------------------------------------------------------------------------------------------------------------------------------------------------------------------------------------------------------------------------------------------------------------------------------------------------------------------------------------------------------------------------------------------------------------------------------------------------------------------------------------------------------------------------------------------------------------------------------------------------------------------------------------------------------------------------------------------------------------------------------------------------------------------------------------------------------------------------------------------------------------------------------------------------------|-----------|
|   | “fermenting”)                                                                                                                                                                                                                                                                                                                                                                                                                                                                                                                                                                                                                                                                                                                                                                                                                                                                                                                                                                                                                                                                                                                                                                                                                                                                                                                                                                                                                                                                                                                                                                                                                                                                                                                                                                                                                                                                                                                                                                                                                                                                                                                                                                                                                                                                                                                                                                                                                                                                                                                                                                                                                                                                                         |           |
| 5 | TITLE-ABS-KEY (“Acer platanoides” OR “Aegopodium podagraria” OR “Alcea rosea” OR “Allium” OR “Allium cepa” OR “Allium sativum” OR “Allium schoenoprasum” OR “Anethum graveolens” OR “Apium graveolens” OR “Arctium lappa” OR “Armoracia rusticana” OR “Artemisia absinthium” OR “Atriplex” OR “Avena sativa” OR “Berberis vulgaris” OR “Beta vulgaris” OR “Betula pendula” OR “Betula pubescens” OR “Brassica cretica” OR “Brassica nigra” OR “Brassica oleracea” OR “Brassica rapa” OR “Bromus secalinus” OR “Capsicum annuum” OR “Carum carvi” OR “Cicer arietinum” OR “Citrullus lanatus” OR “Citrus limon” OR “Citrus sinensis” OR “Cornelian cherries” OR “Cornus mas” OR “Crataegus” OR “Cucumis melo” OR “Cucumis sativus” OR “Cucurbita pepo” OR “Cyanus segetum hill” OR “Cydonia oblonga” OR “Daucus carota” OR “Empetrum nigrum” OR “Fagopyrum esculentum moench” OR “Fagus sylvatica” OR “Fragaria vesca” OR “Gentiana lutea” OR “Helianthus tuberosus” OR “Heracleum sphondylium” OR “Hordeum distichon” OR “Hordeum vulgare” OR “Humulus lupulus” OR “Juniperus communis” OR “Laurus nobilis” OR “Ledum palustre” OR “Linum usitatissimum” OR “Maianthemum bifolium” OR “Malus domestica” OR “Melittis melissophyllum” OR “Mentha” OR “Menyanthes trifoliata” OR “Mespilus germanica” OR “Morus alba” OR “Morus nigra” OR “Myrica gale” OR “Malus” OR “Malus sylvestris” OR “Panicum miliaceum” OR “Persicaria bistorta” OR “Phaseolus vulgaris” OR “Pimenta dioica” OR “Piper nigrum” OR “Pisum sativum” OR “Polypodium vulgare” OR “Prunus fruticans weihe” OR “Prunus armeniaca” OR “Prunus avium” OR “Prunus cerasifera” OR “Prunus cerasus” OR “Prunus domestica” OR “Prunus padus” OR “Prunus spinosa” OR “Primula veris” OR “Pteridium aquilinum” OR “Pyrus communis” OR “Pyrus elaeagnifolia” OR “Pyrus pyraeaster” OR “Quercus robur” OR “Ribes alpinum” OR “Ribes nigrum” OR “Ribes rubrum” OR “Ribes spicatum robson” OR “Ribes uva-crispa” OR “Rubus caesius” OR “Rubus fruticosus” OR “Rubus idaeus” OR “Rubus saxatilis” OR “Rubus subgenus rubus” OR “Robinia pseudoacacia” OR “Rosa canina” OR “Rosa” OR “Sambucus ebulus” OR “Sambucus nigra” OR “Secale cereale” OR “Solanum lycopersicum” OR “Solanum tuberosum” OR “Sorbus aucuparia” OR “Sorbus domestica” OR “Sorbus intermedia” OR “Sorbus rupicola” OR “Sorbus torminalis” OR “Tanacetum vulgare” OR “Taraxacum” OR “Tilia tomentosa moench” OR “Triticum” OR “Vaccinium myrtillus” OR “Vaccinium oxycoccos” OR “Vaccinium uliginosum” OR “Vaccinium vitis-idaea” OR “Viburnum opulus” OR “Vicia faba” OR “Vitis” OR “Zea mays”) AND TITLE-ABS-KEY (“fermented” OR “fermentation” OR “ferment” OR “fermenting”) | 16,476    |
| 6 | TITLE-ABS-KEY (“Alzheimer Dementia” OR “Alzheimer Dementias” OR “Dementia, Alzheimer” OR “Alzheimer's Disease” OR “Dementia, Senile”                                                                                                                                                                                                                                                                                                                                                                                                                                                                                                                                                                                                                                                                                                                                                                                                                                                                                                                                                                                                                                                                                                                                                                                                                                                                                                                                                                                                                                                                                                                                                                                                                                                                                                                                                                                                                                                                                                                                                                                                                                                                                                                                                                                                                                                                                                                                                                                                                                                                                                                                                                  | 3,581,057 |

|   |                                                                                                                                                                                                                                                                                                                                                                                                                                                                                                                                                                                                                                                                                                                                                                                                                                                                                                                                                                                                                                                                                                                                                                                                                                                                                                                                                                                                                                                                                                                                                                                                                                                                                                                                                                                                                                                                                                                                                                                                                                                                                                                                                                                                                    |            |
|---|--------------------------------------------------------------------------------------------------------------------------------------------------------------------------------------------------------------------------------------------------------------------------------------------------------------------------------------------------------------------------------------------------------------------------------------------------------------------------------------------------------------------------------------------------------------------------------------------------------------------------------------------------------------------------------------------------------------------------------------------------------------------------------------------------------------------------------------------------------------------------------------------------------------------------------------------------------------------------------------------------------------------------------------------------------------------------------------------------------------------------------------------------------------------------------------------------------------------------------------------------------------------------------------------------------------------------------------------------------------------------------------------------------------------------------------------------------------------------------------------------------------------------------------------------------------------------------------------------------------------------------------------------------------------------------------------------------------------------------------------------------------------------------------------------------------------------------------------------------------------------------------------------------------------------------------------------------------------------------------------------------------------------------------------------------------------------------------------------------------------------------------------------------------------------------------------------------------------|------------|
|   | <p>OR "Senile Dementia" OR "Dementia, Alzheimer Type" OR "Alzheimer Type Dementia" OR "Alzheimer-Type Dementia" OR "Alzheimer Type Dementia" OR "Dementia, Alzheimer-Type" OR "Alzheimer Type Senile Dementia" OR "Primary Senile Degenerative Dementia" OR "Dementia, Primary Senile Degenerative" OR "Alzheimer Sclerosis" OR "Sclerosis, Alzheimer" OR "Alzheimer Syndrome" OR "Alzheimer's Diseases" OR "Alzheimer Diseases" OR "Alzheimers Diseases" OR "Senile Dementia, Alzheimer Type" OR "Acute Confusional Senile Dementia" OR "Senile Dementia, Acute Confusional" OR "Dementia, Presenile" OR "Presenile Dementia" OR "Alzheimer Disease, Late Onset" OR "Late Onset Alzheimer Disease" OR "Alzheimer's Disease, Focal Onset" OR "Focal Onset Alzheimer's Disease" OR "Familial Alzheimer Disease" OR "Alzheimer Disease, Familial" OR "Familial Alzheimer Diseases" OR "Alzheimer Disease, Early Onset" OR "Early Onset Alzheimer Disease" OR "Presenile Alzheimer Dementia" OR "Cognitive damage" OR "Cognitive decline" OR "Cognitive declines" OR "Cognitive disorders" OR "Cognitive dysfunction" OR "Cognitive dysfunctions" OR "Cognitive failure" OR "Cognitive frailty" OR "Cognitive function" OR "Cognitive functions" OR "Cognitive function scanner" OR "Cognitive impairment" OR "Cognitive impairments" OR "Cognitive impairment, mild" OR "Cognitive impairments, mild" OR "Cognition performance" OR "Cognitive retention disorders" OR "Decline, cognitive" OR "Declines, cognitive" OR "Deficit, memory" OR "Deficits, memory" OR "Dysfunction, cognitive" OR "Dysfunctions, cognitive" OR "Impairment, cognitive" OR "Impairments, cognitive" OR "Impairment, mild cognitive" OR "Impairments, mild cognitive" OR "Learning" OR "Learning ability" OR "Memory" OR "Memory decline" OR "Memory defects" OR "Memory deficit" OR "Memory deficits" OR "Memory disorder" OR "Memory disorders, age related" OR "Memory disorders, age-related" OR "Memory disorder, semantic" OR "Memory disorder, spatial" OR "Memory disorders, spatial" OR "Memory for designs test" OR "Memory impairment" OR "Memory loss" OR "Memory losses" OR "Familial dementia" OR "Familial dementias")</p> |            |
| 7 | <p>TITLE-ABS-KEY ("animal experimentation" OR "models, animal" OR "invertebrates" OR "Animals" OR "animal population groups" OR "chordata" OR "chordata, nonvertebrate" OR "vertebrates" OR "amphibians" OR "birds" OR "fishes" OR "reptiles" OR "mammals" OR "primates" OR "artiodactyla" OR "carnivora" OR "cetacea" OR "chiroptera" OR "elephants" OR "hyraxes" OR "insectivora" OR "lagomorpha" OR "marsupialia" OR "monotremata" OR "perissodactyla" OR "rodentia" OR "scandentia" OR "sirenia" OR "xenarthra" OR "haplorhini" OR "strepsirhini" OR "platyrrhini" OR "tarsii" OR "catarrhini" OR "cercopithecidae" OR "hylobatidae" OR "hominidae" OR "gorilla gorilla" OR "pan paniscus" OR "pan troglodytes" OR "pongo pygmaeus" OR "animals" OR "animal" OR "mice" OR "mus" OR "mouse" OR "murine" OR "woodmouse" OR "rats" OR "rat" OR "murinae" OR</p>                                                                                                                                                                                                                                                                                                                                                                                                                                                                                                                                                                                                                                                                                                                                                                                                                                                                                                                                                                                                                                                                                                                                                                                                                                                                                                                                                   | 11,255,979 |

“muridae” OR “cottonrat” OR “cottonrats” OR “hamster” OR “hamsters” OR “cricetinae” OR “rodentia” OR “rodent” OR “rodents” OR “pigs” OR “pig” OR “swine” OR “swines” OR “piglets” OR “piglet” OR “boar” OR “boars” OR “sus scrofa” OR “ferrets” OR “ferret” OR “polecat” OR “polecats” OR “mustela putorius” OR “guinea pigs” OR “guinea pig” OR “cavia” OR “callithrix” OR “marmoset” OR “marmosets” OR “cebuella” OR “hapale” OR “octodon” OR “chinchilla” OR “chinchillas” OR “gerbillinae” OR “gerbil” OR “gerbils” OR “jird” OR “jirds” OR “merione” OR “meriones” OR “rabbits” OR “rabbit” OR “hares” OR “hare” OR “diptera” OR “flies” OR “fly” OR “dipteral” OR “drosophila” OR “drosophilidae” OR “cats” OR “cat” OR “carus” OR “felis” OR “nematoda” OR “nematode” OR “nematodes” OR “sipunculida” OR “dogs” OR “dog” OR “canine” OR “canines” OR “canis” OR “sheep” OR “sheeps” OR “mouflon” OR “mouflons” OR “ovis” OR “goats” OR “goat” OR “capra” OR “capras” OR “rupicapra” OR “rupicapras” OR “chamois” OR “haplorhini” OR “monkey” OR “monkeys” OR “anthropoidea” OR “anthropoids” OR “saguinus” OR “tamarin” OR “tamarins” OR “leontopithecus” OR “hominidae” OR “ape” OR “apes” OR “pan paniscus” OR “bonobo” OR “bonobos” OR “pan troglodytes” OR “gibbon” OR “gibbons” OR “siamang” OR “siamangs” OR “nomascus” OR “symphalangus” OR “chimpanzee” OR “chimpanzees” OR “prosimian” OR “prosimians” OR “bush baby” OR “bush babies” OR “galagos” OR “galago” OR “pongidae” OR “gorilla” OR “gorillas” OR “pongo pygmaeus” OR “orangutan” OR “orangutans” OR “lemur” OR “lemurs” OR “lemuridae” OR “horse” OR “horses” OR “equus” OR “cow” OR “calf” OR “bull” OR “chicken” OR “chickens” OR “gallus” OR “quail” OR “bird” OR “birds” OR “quails” OR “poultry” OR “poultres” OR “fowl” OR “fowls” OR “reptile” OR “reptilia” OR “reptiles” OR “snakes” OR “snake” OR “lizard” OR “lizards” OR “alligator” OR “alligators” OR “crocodile” OR “crocodiles” OR “turtle” OR “turtles” OR “amphibian” OR “amphibians” OR “amphibia” OR “frog” OR “frogs” OR “bombina” OR “salientia” OR “toad” OR “toads” OR “epidalea calamita” OR “salamander” OR “salamanders” OR “eel” OR “eels” OR “fish” OR “fishes” OR “pisces” OR “catfish” OR “catfishes” OR “siluriformes” OR “arius” OR “heteropneustes” OR “sheatfish” OR “perch” OR “perches” OR “percidae” OR “perca” OR “trout” OR “trouts” OR “char” OR “chars” OR “salvelinus” OR “minnow” OR “cyprinidae” OR “carps” OR “carp” OR “zebrafish” OR “zebrafishes” OR “goldfish” OR “goldfishes” OR “guppy” OR “guppies” OR “chub” OR “chubs” OR “tinca” OR “barbels” OR “barbus” OR “pimephales” OR “promelas” OR “poecilia reticulata” OR “mullet” OR “mulletts” OR “eel” OR “eels” OR “seahorse” OR “seahorses” OR “mugil curema” OR “atlantic cod” OR “shark” OR “sharks” OR “catshark” OR “anguilla” OR “salmonid” OR “salmonids” OR “whitefish” OR “whitefishes” OR “salmon” OR “salmons” OR “sole” OR “solea” OR “lamprey” OR “lampreys” OR “pumpkinseed” OR “sunfish” OR “sunfishes” OR “tilapia” OR “tilapias” OR “turbot” OR “turbotts” OR “flatfish” OR “flatfishes” OR “sciuridae” OR “squirrel” OR “squirrels” OR “chipmunk” OR “chipmunks” OR “suslik” OR “susliks” OR “vole” OR “voles” OR “lemming” OR

|   |                                                                                                                                                                                                                                                                                                                                                                                                                                                                                                                                                                                                                                                                                                                                                                                                                                                                                                                                                                                  |         |
|---|----------------------------------------------------------------------------------------------------------------------------------------------------------------------------------------------------------------------------------------------------------------------------------------------------------------------------------------------------------------------------------------------------------------------------------------------------------------------------------------------------------------------------------------------------------------------------------------------------------------------------------------------------------------------------------------------------------------------------------------------------------------------------------------------------------------------------------------------------------------------------------------------------------------------------------------------------------------------------------|---------|
|   | <p>“lemmings” OR “muskrat” OR “muskrats” OR “lemmus” OR “otter” OR “otters” OR “marten” OR “martens” OR “martes” OR “weasel” OR “badger” OR “badgers” OR “ermine” OR “mink” OR “minks” OR “sable” OR “sables” OR “gulo” OR “gulos” OR “wolverine” OR “wolverines” OR “mustela” OR “llama” OR “llamas” OR “alpaca” OR “alpacas” OR “camelid” OR “camelids” OR “guanaco” OR “guanacos” OR “chiroptera” OR “chiropteras” OR “bat” OR “bats” OR “fox” OR “foxes” OR “iguana” OR “iguanas” OR “xenopus laevis” OR “parakeet” OR “parakeets” OR “parrot” OR “parrots” OR “donkey” OR “donkeys” OR “mule” OR “mules” OR “zebra” OR “zebras” OR “shrew” OR “shrews” OR “bison” OR “bisons” OR “buffalo” OR “buffaloes” OR “deer” OR “deers” OR “bear” OR “bears” OR “panda” OR “pandas” OR “wild hog” OR “wild boar” OR “fitchew” OR “fitch” OR “beaver” OR “beavers” OR “jerboa” OR “jerboas” OR “capybara” OR “capybaras” OR “canine” OR “bovine” OR “porcine” OR “hog” OR “hogs”)</p> |         |
| 8 | #1 OR #2 OR #3 OR #4 OR #5                                                                                                                                                                                                                                                                                                                                                                                                                                                                                                                                                                                                                                                                                                                                                                                                                                                                                                                                                       | 369,692 |
| 9 | #6 AND #7 AND #8                                                                                                                                                                                                                                                                                                                                                                                                                                                                                                                                                                                                                                                                                                                                                                                                                                                                                                                                                                 | 812     |
